# Supplementary material for: Whole genome sequencing and imputation in isolated populations identify genetic associations with medically-relevant complex traits
Source: PubMed Central journal article supplement (PMC5458552; doi:10.1038/ncomms15606), 2017-05-26
Supplement: ncomms15606-s1.pdf [file ncomms15606-s1.pdf]

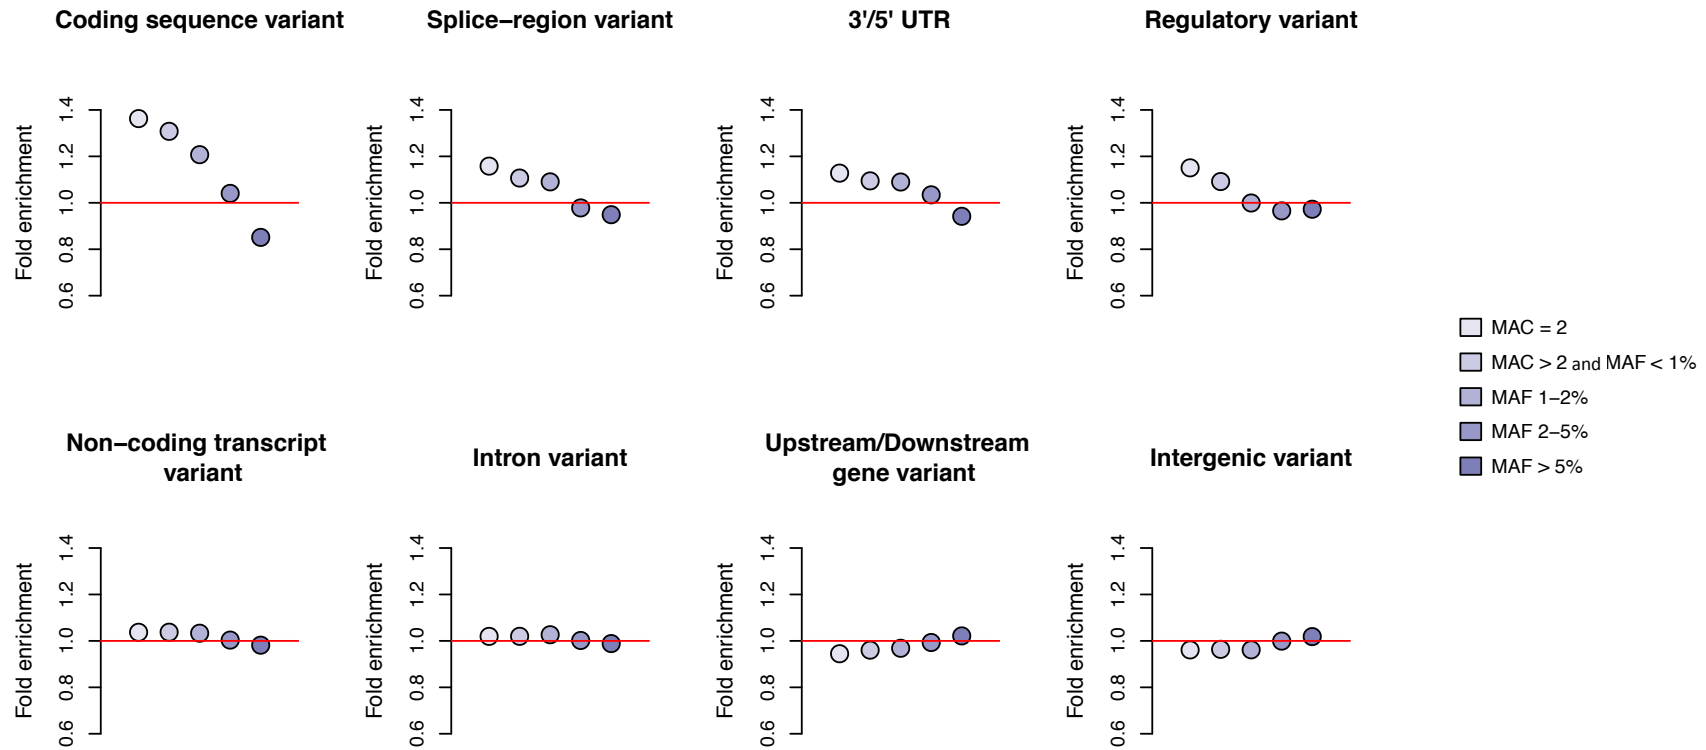

**Supplementary Figure 1: MANOLIS WGS variant consequences and allele frequencies.**

MAF, minor allele frequencies; MAC, minor allele count. The x-axis shows MAF category, the y axis shows fold enrichment. Enrichment is calculated by dividing the proportion of variants of a given consequence observed in a MAF bin by the proportion of variants of the same consequence in the total dataset. For numerical values see Supplementary Table 3.

**a.**

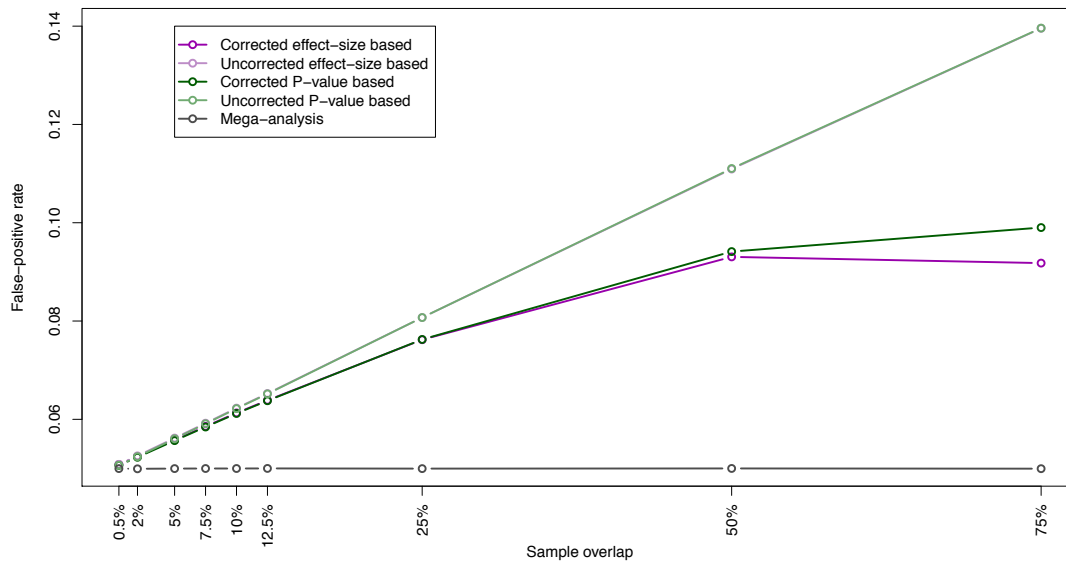

**b.**

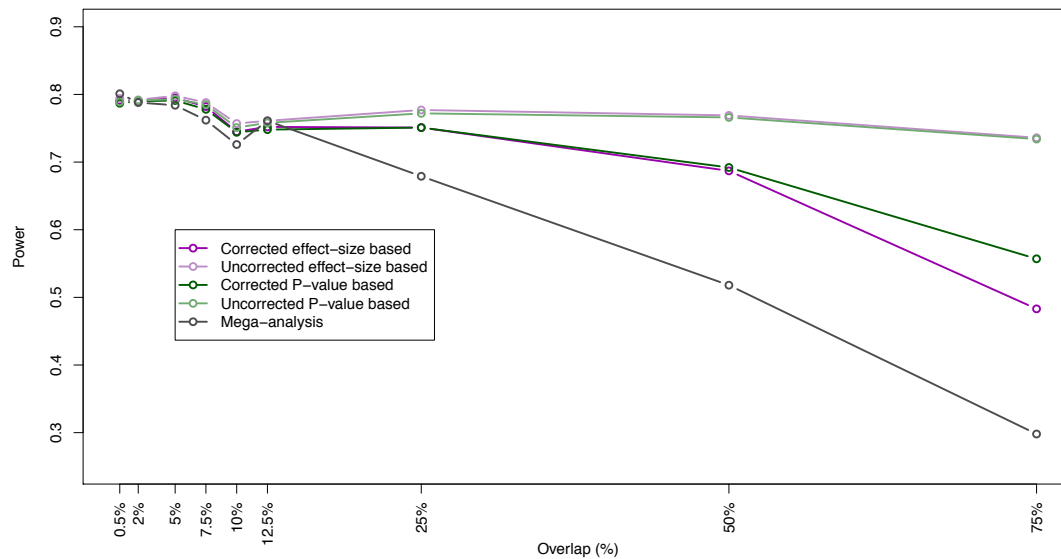

**Supplementary Figure 2: Power and false-positive rate for METACARPA under extensive sample overlap.**

**a.** Empirical false-positive rate as a function of sample overlap in 1,000 repeats of a meta-analysis of two studies including 2,000 samples each, at a significance threshold of  $5.00 \times 10^{-8}$ . **b.** Empirical power of the four tests implemented in METACARPA as a function of sample overlap in the same simulation setting. Power is calculated as the discovery rate of a SNP explaining 1% of a standard normal phenotype under the same simulation scenario (e.g. a MAF of 1% and an effect size of 0.705, or a MAF of 20% and an effect size of 0.176).

**METACARPA**  
lambda=0.9901

**GWAMA**  
lambda=0.9999

**mega-analysis**  
lambda=0.9746

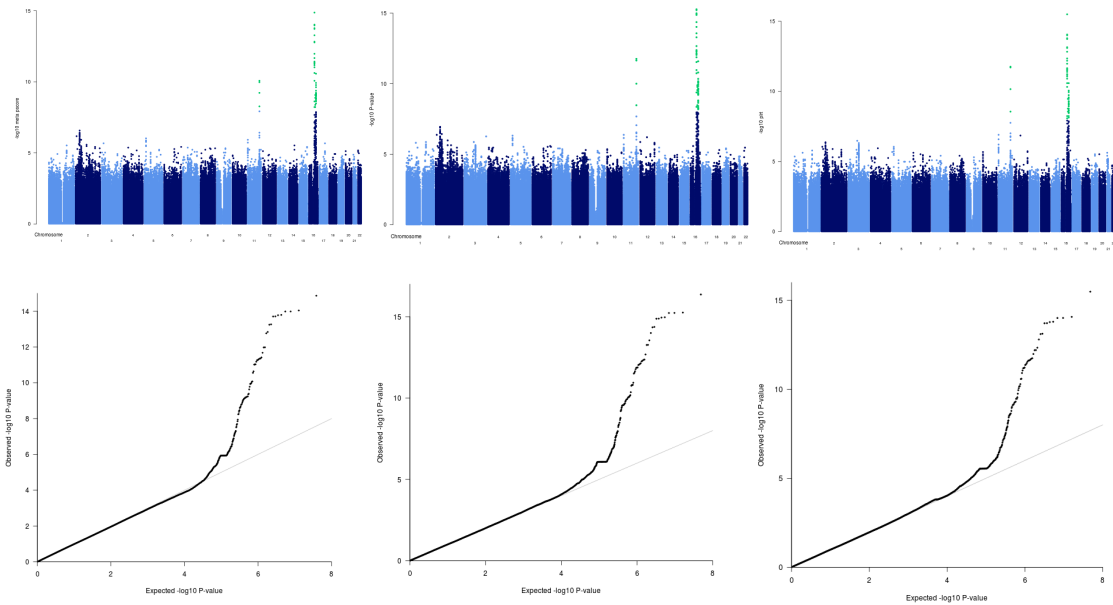

**Supplementary Figure 3: Comparison between three meta-analysis strategies on the HELIC MANOLIS dataset.**

The trait being meta-analysed is HDL. The top 3 panels are the Manhattan plots for the 3 analysis approaches taken, with the corresponding qq-plots in the lower panels.

**a. Association between rs140087759 and WHR in HELIC MANOLIS.**

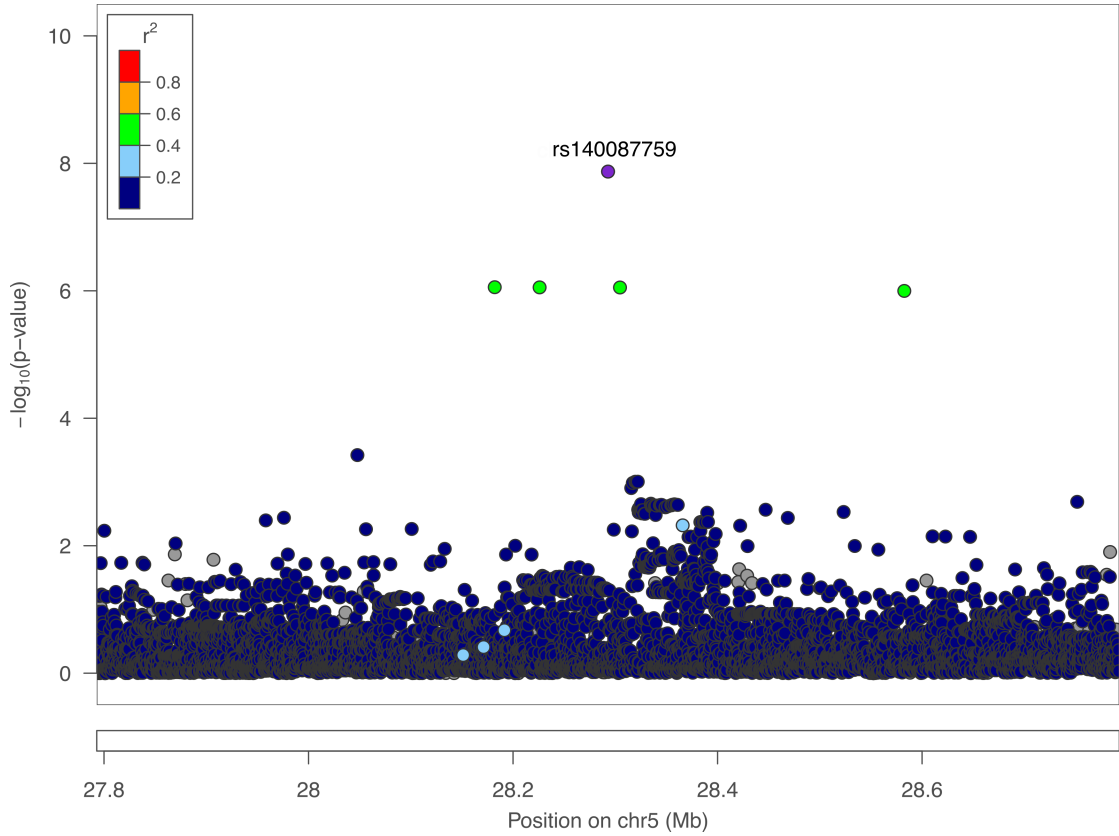

**b. Association between rs13382259 and DBP in HELIC Pomak.**

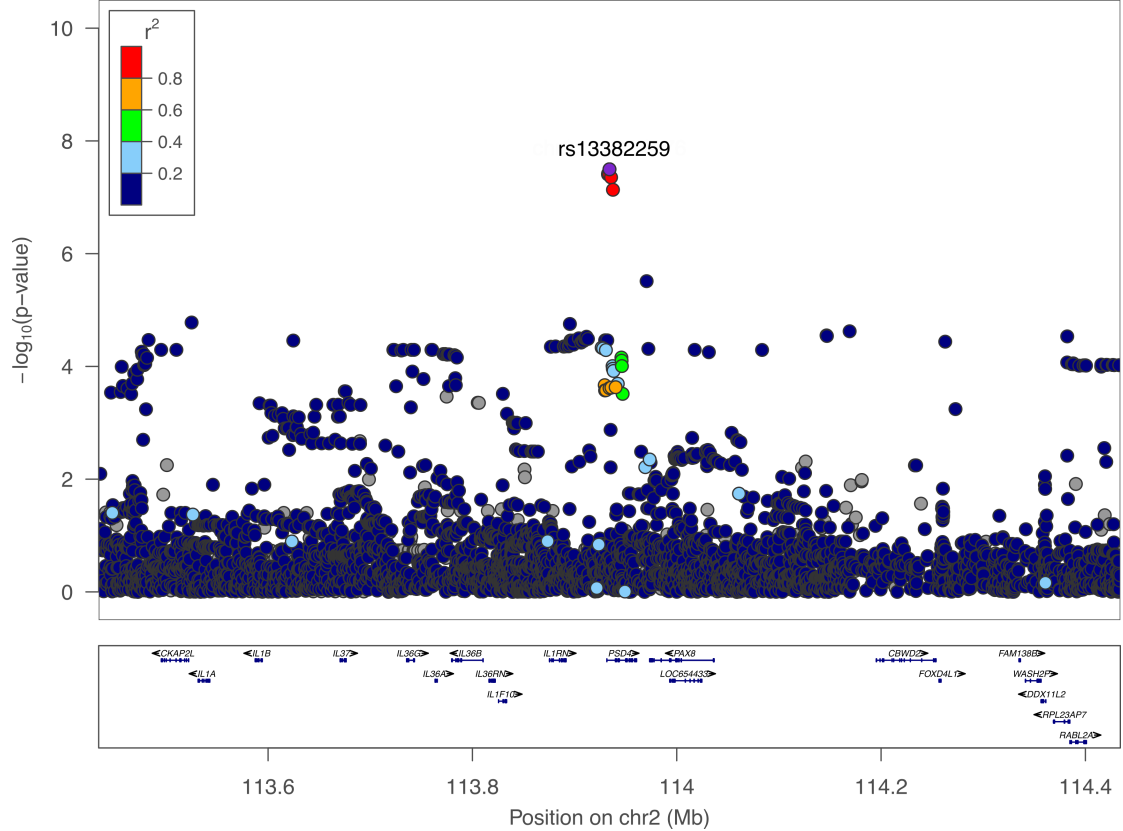



**c. Association between rs6131100 and FGadjBMI in HELIC Pomak.**

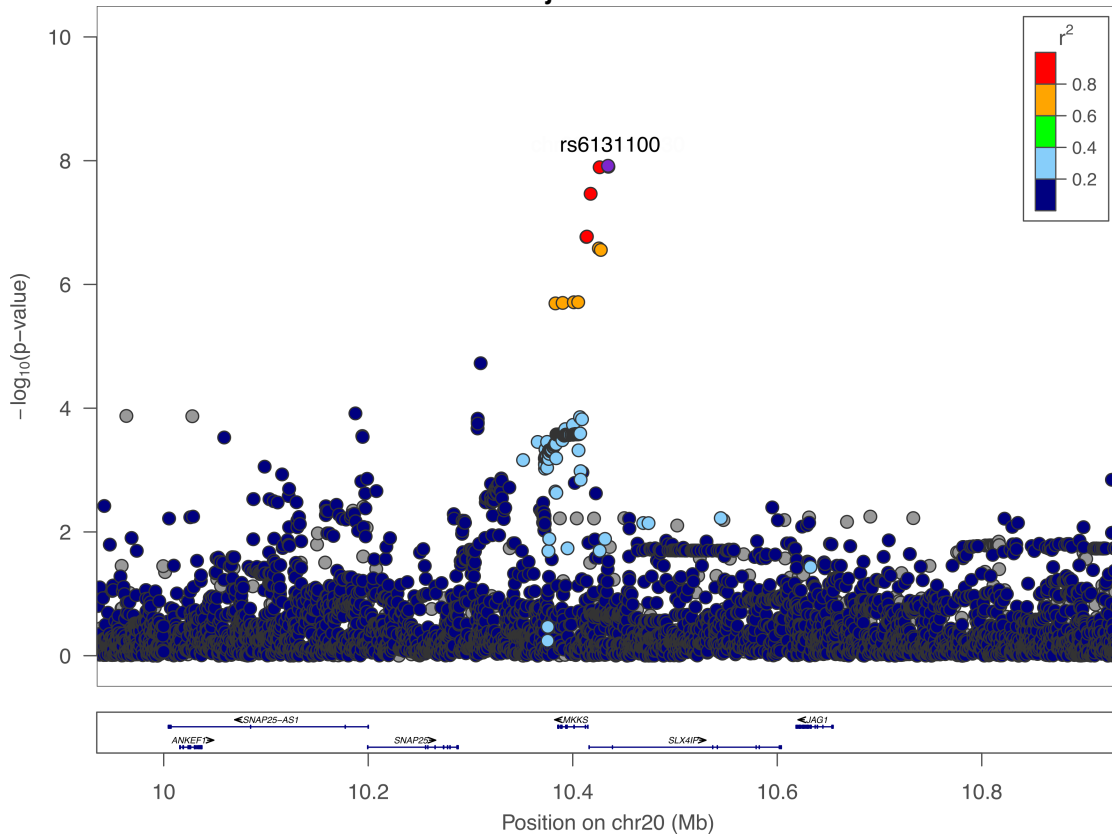

**d. Association between rs79748197 and WBC in HELIC Pomak.**

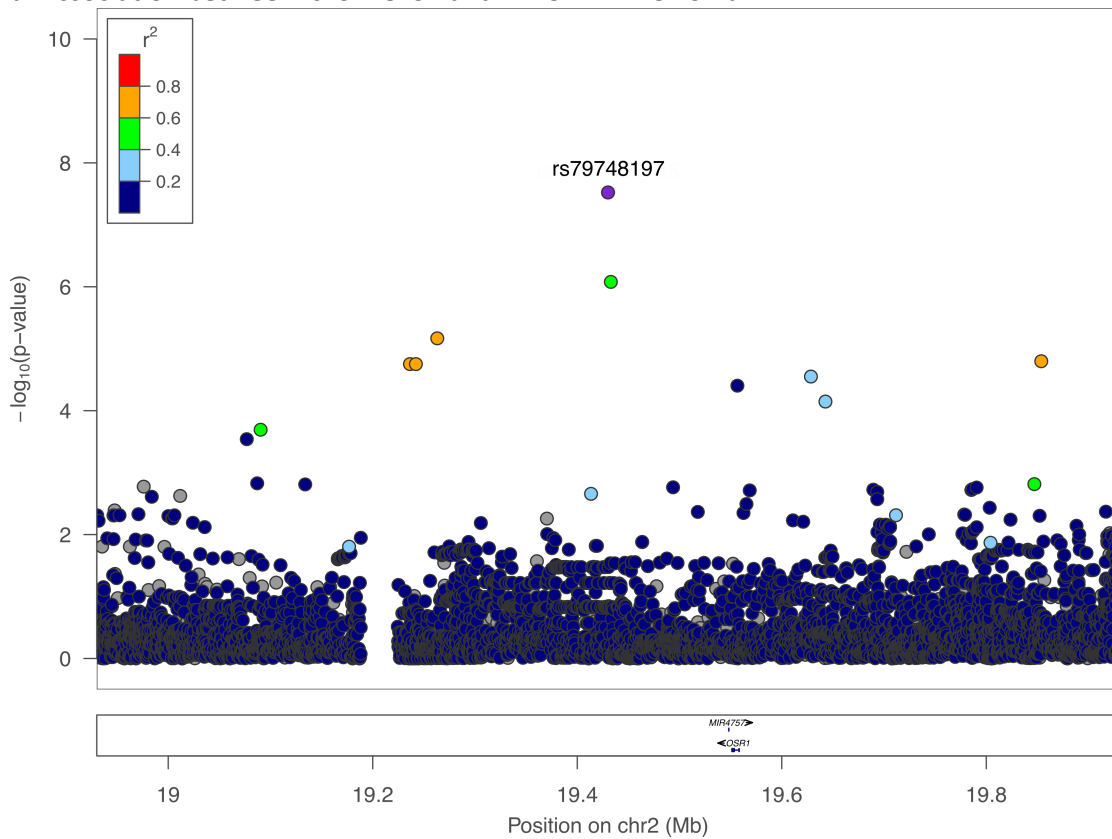

**e. Association between rs557129696 and HGB in HELIC Pomak.**

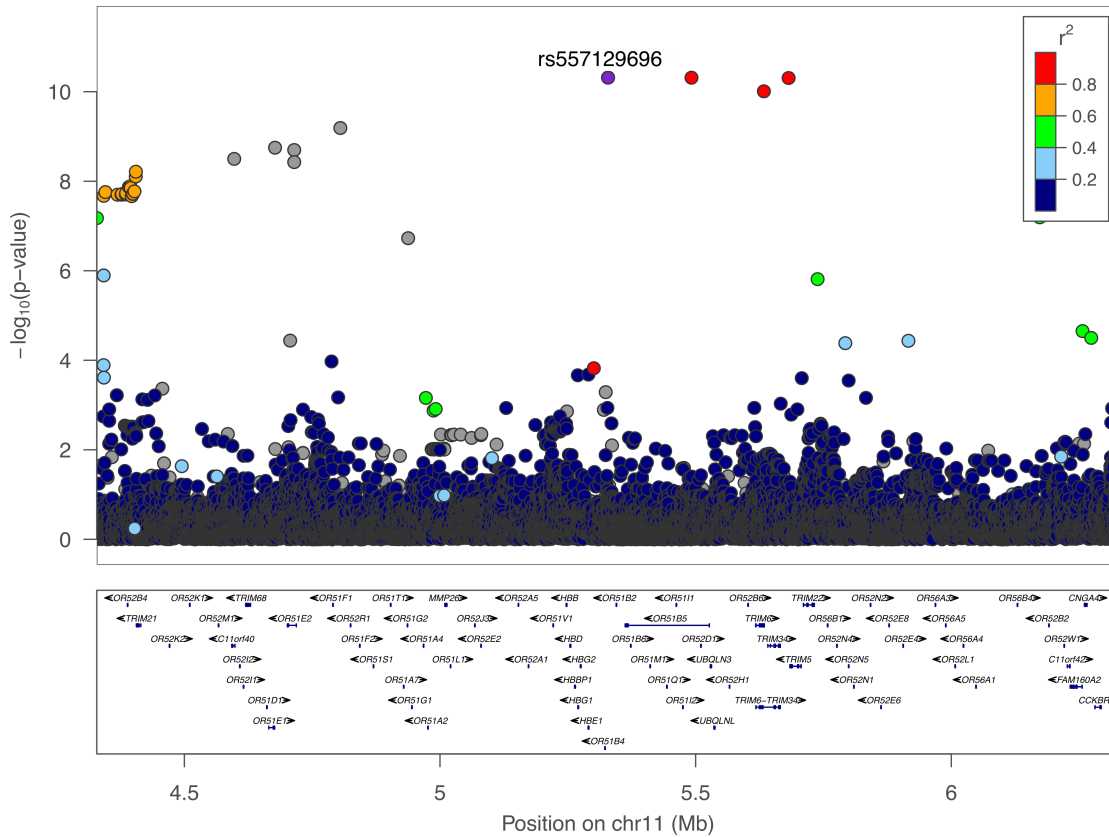

**f. Association between rs112037309 and weight in HELIC MANOLIS and Pomak.**

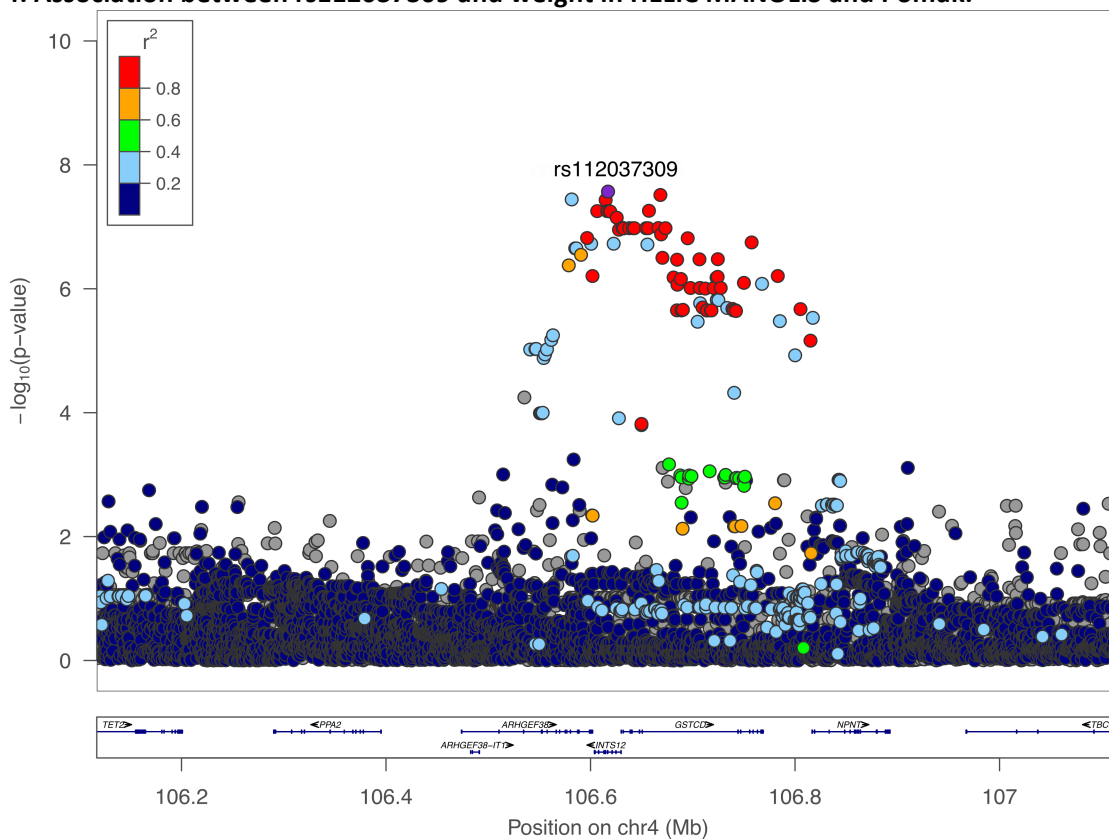

**Supplementary Figure 4: Regional association plots for the novel signals.**

LocusZoom was used to create the plots (<http://csg.sph.umich.edu/locuszoom/>). The LD was generated empirically using the OmniExome imputed genotypes from the appropriate cohort. For the MANOLIS and Pomak meta-analysis the Pomak OmniExome data was used for the LD calculation. The

$r^2$  correlation is represented by different colours (grey, no info; dark blue, 0–0.2; light blue, 0.2–0.4; green, 0.4–0.6; yellow, 0.6–0.8; red, 0.8–1.0).  $-\log_{10}(\text{p-value})$  is the Wald test  $P$  value from the association analysis using METACARPA.

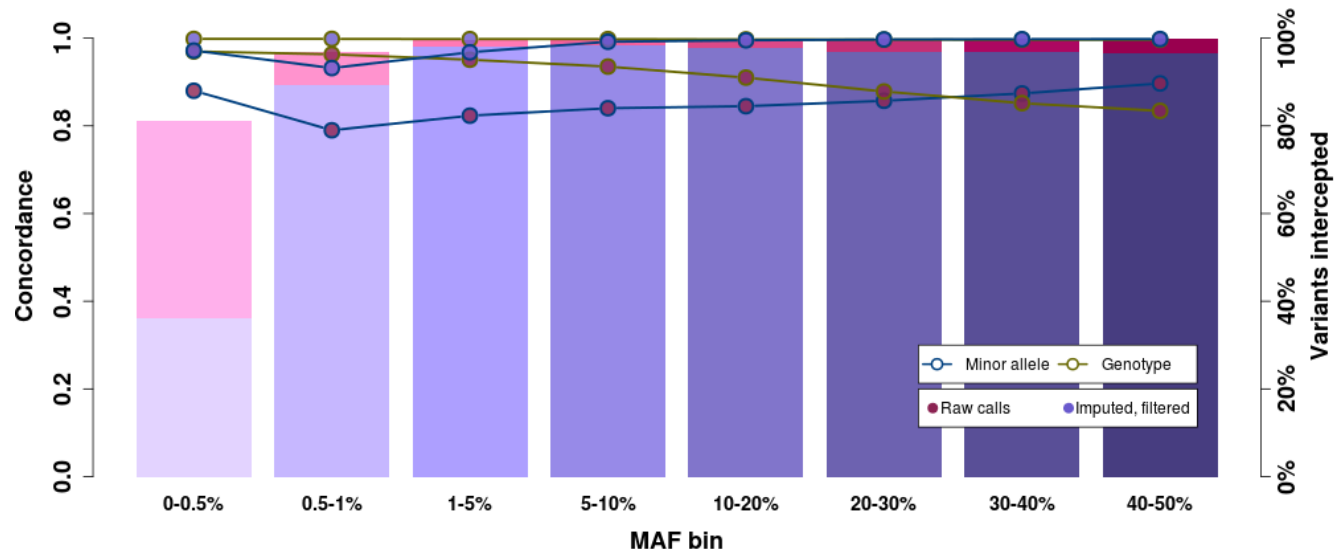

**Supplementary Figure 5: Variants called, genotype and minor allele concordance pre- and post-filtering and imputation in the 4x WGS data compared to the array data.**

Bars indicate the proportion of variants present in the chip data that were called in the WGS data, per given MAF category. Pink-red bars represent raw sequencing variants (pre-filtering), purple bars represent filtered variants following VQSR, sample and variant-level QC, and phasing (post-filtering). The blue curves indicate minor allele concordance, the grey ones genotype concordance. Points for concordance are coloured in pink-red for the unfiltered dataset and purple for the filtered dataset. The y-axis on the right (Variants Intercepted) refers to the bars and the y-axis on the left (Concordance) refers to the curves.

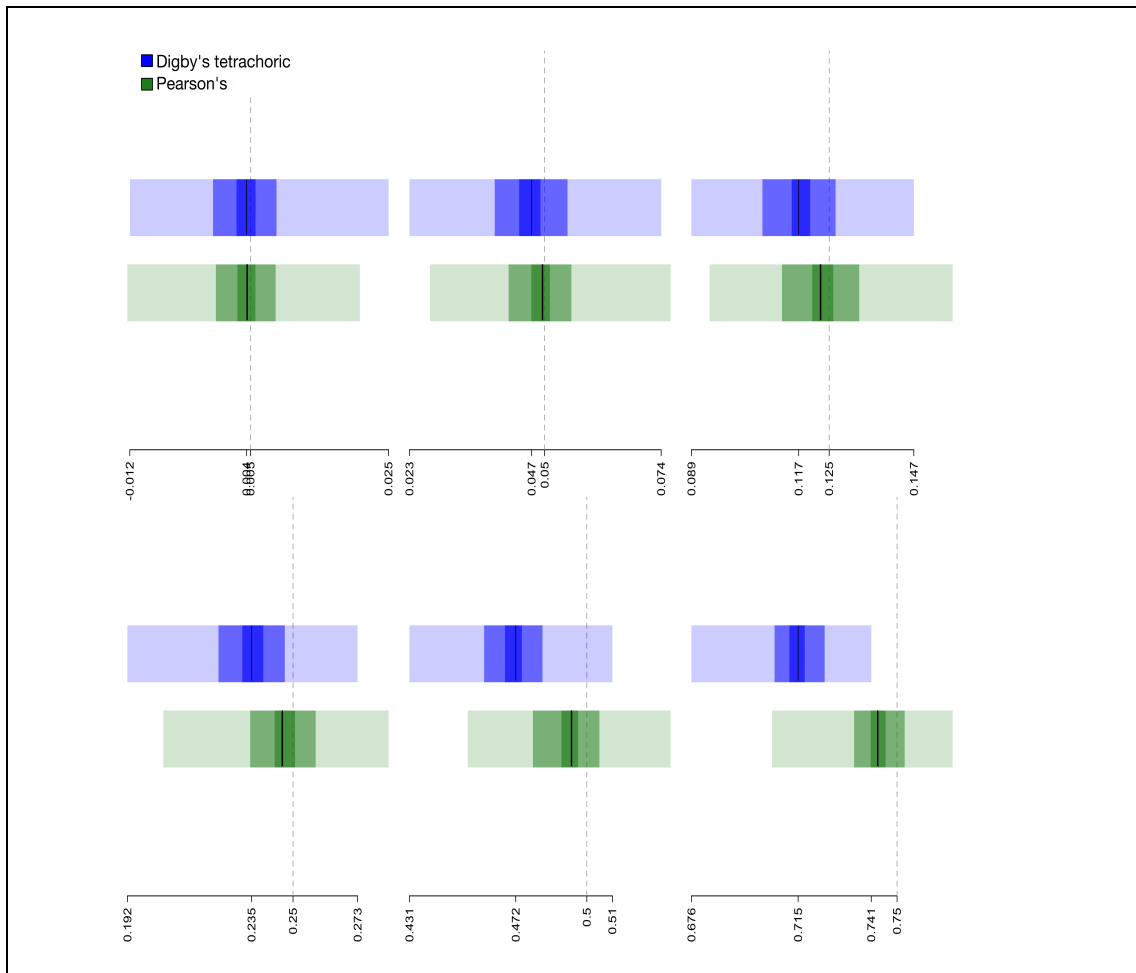

**Supplementary Figure 6: Accuracy of tetrachoric correlation of z-scores under different trait architectures.** Accuracy when all SNPs are under the null, for increasing sample overlap. Green boxes represent the quintiles of the correlation estimates for Pearson's correlation of z-scores, blue boxes the quintiles of Digby's estimator of tetrachoric correlation. Real expected correlation is represented by the dashed grey line.

| <b>Genomic region</b>  | <b>Variant count<br/>(% of total)</b> | <b>Mean SNV density<br/>(kbp<sup>-1</sup>)</b> | <b>SEM</b> |
|------------------------|---------------------------------------|------------------------------------------------|------------|
| Splice region          | 11,232 (0.12%)                        | 1.924                                          | 0.018      |
| Coding                 | 73,310 (0.76%)                        | 2.096                                          | 0.016      |
| UTR                    | 133,097 (1.37%)                       | 2.620                                          | 0.024      |
| Intronic               | 4,878,515 (50.27%)                    | 3.339                                          | 0.049      |
| Upstream or Downstream | 937,271 (9.66%)                       | 3.494                                          | 0.010      |
| Intergenic             | 3,670,836 (37.83%)                    | 3.657                                          | 0.016      |
| Whole genome           | 9,554,503                             | 3.570                                          | -          |

**Supplementary Table 1: HELIC MANOLIS annotation summary.**

Average densities of single nucleotide variants by functional annotation.

| MAF category                       | 3'/5' UTR         | Coding sequence variant | Intergenic variant   | Intron variant       | Non-coding transcript variant | Splice-region variant | Regulatory region variant | Upstream/Downstream gene variant | MAF-bin total |
|------------------------------------|-------------------|-------------------------|----------------------|----------------------|-------------------------------|-----------------------|---------------------------|----------------------------------|---------------|
| <b>MAC = 2</b>                     | 10,506<br>(1.128) | 8,079<br>(1.363)        | 269,160<br>(0.961)   | 393,877<br>(1.020)   | 12,176<br>(1.037)             | 1,077<br>(1.158)      | 23,053<br>(1.151)         | 62,351<br>(0.945)                | 780,279       |
| <b>MAC &gt; 2 and MAF &lt;= 1%</b> | 11,659<br>(1.095) | 8,868<br>(1.308)        | 308,623<br>(0.964)   | 450,591<br>(1.020)   | 13,929<br>(1.038)             | 1,177<br>(1.107)      | 25,012<br>(1.092)         | 72,480<br>(0.960)                | 892,339       |
| <b>MAF 1-2%</b>                    | 13,403<br>(1.090) | 9,453<br>(1.207)        | 355,599<br>(0.962)   | 523,814<br>(1.027)   | 16,016<br>(1.033)             | 1,339<br>(1.090)      | 26,438<br>(0.999)         | 84,401<br>(0.968)                | 1,030,463     |
| <b>MAF 2-5%</b>                    | 16,173<br>(1.034) | 10,357<br>(1.041)       | 469,698<br>(0.999)   | 649,806<br>(1.002)   | 19,777<br>(1.004)             | 1,527<br>(0.978)      | 32,465<br>(0.965)         | 110,040<br>(0.993)               | 1,309,843     |
| <b>MAF &gt; 5%</b>                 | 62,307<br>(0.942) | 35,836<br>(0.851)       | 2,025,615<br>(1.019) | 2,712,522<br>(0.989) | 81,837<br>(0.982)             | 6,267<br>(0.949)      | 138,347<br>(0.972)        | 478,848<br>(1.022)               | 5,541,579     |
| <b>Consequence total</b>           | 114,048           | 72,593                  | 3,428,695            | 4,730,610            | 143,735                       | 11,387                | 245,315                   | 808,120                          | 9,554,503     |

**Supplementary Table 2: MANOLIS reference panel variant consequence and allele frequency summary.**

Numbers in parentheses indicate the fold enrichment of a consequence in the corresponding MAF bin comparing to the frequency of that consequence in the total dataset.

| AF category          | MANOLIS + UK10K | MANOLIS + 1000Genomes | MANOLIS + UK10K + 1000Genomes | Unique in MANOLIS | Unique (%) | Distribution of unique variants* |
|----------------------|-----------------|-----------------------|-------------------------------|-------------------|------------|----------------------------------|
| MAC = 2              | 94,906          | 84,099                | 351,662                       | <b>249,612</b>    | 31.99%     | 47.59%                           |
| MAC > 2 & MAF <= 1%  | 84,004          | 103,054               | 531,176                       | <b>174,105</b>    | 19.51%     | 33.19%                           |
| MAF > 1% & MAF <= 2% | 47,665          | 100,075               | 804,614                       | <b>78,109</b>     | 7.58%      | 14.89%                           |
| MAF > 2% & MAF <= 5% | 12,256          | 91,177                | 1,187,117                     | <b>19,293</b>     | 1.47%      | 3.68%                            |
| MAF > 5%             | 2,633           | 388,369               | 5,147,197                     | <b>3,380</b>      | 0.06%      | 0.64%                            |
| Total:               | 241,464         | 766,774               | 8,021,766                     | <b>524,499</b>    | 5.49%      | 100%                             |

### Supplementary Table 3: HELIC MANOLIS reference panel summary.

Comparison of the HELIC MANOLIS reference panel variants with the UK10K and 1000 Genomes Project reference panel variants. \* Indicates how the number of unique variants are distributed across MAF categories.



| Consequence                   | MAF bin | Shared        |                          |            | Unique to HELIC MANOLIS |                          |            | Enrichment | P                             |
|-------------------------------|---------|---------------|--------------------------|------------|-------------------------|--------------------------|------------|------------|-------------------------------|
|                               |         | Variant count | Variant count in MAF bin | Proportion | Variant count           | Variant count in MAF bin | Proportion |            |                               |
| Regulatory variant            | MAC=2   | 14,062        | 530,667                  | 0.026      | 8,991                   | 249,612                  | 0.036      | 1.3593     | <b>3.64x10<sup>-117</sup></b> |
|                               | ≤1%     | 18,599        | 718,234                  | 0.026      | 6,413                   | 174,105                  | 0.037      | 1.4224     | <b>2.84x10<sup>-134</sup></b> |
|                               | ≤5%     | 55,520        | 2,242,904                | 0.025      | 3,383                   | 97,402                   | 0.035      | 1.4031     | <b>8.71x10<sup>-83</sup></b>  |
|                               | >5%     | 138,243       | 5,538,199                | 0.025      | 104                     | 3,380                    | 0.031      | 1.2327     | 1.00x10 <sup>0</sup>          |
| UTR                           | MAC=2   | 7,070         | 530,667                  | 0.013      | 3,436                   | 249,612                  | 0.014      | 1.0332     | 1.00x10 <sup>0</sup>          |
|                               | ≤1%     | 9,148         | 718,234                  | 0.013      | 2,511                   | 174,105                  | 0.014      | 1.1323     | <b>9.42x10<sup>-7</sup></b>   |
|                               | ≤5%     | 28,232        | 2,242,904                | 0.013      | 1,344                   | 97,402                   | 0.014      | 1.0962     | <b>3.11x10<sup>-2</sup></b>   |
|                               | >5%     | 62,265        | 5,538,199                | 0.011      | 42                      | 3,380                    | 0.012      | 1.1052     | 1.00x10 <sup>0</sup>          |
| Coding variant                | MAC=2   | 5,037         | 530,667                  | 0.009      | 3,042                   | 249,612                  | 0.012      | 1.2839     | <b>1.95x10<sup>-26</sup></b>  |
|                               | ≤1%     | 6,750         | 718,234                  | 0.009      | 2,118                   | 174,105                  | 0.012      | 1.2944     | <b>5.84x10<sup>-24</sup></b>  |
|                               | ≤5%     | 18,665        | 2,242,904                | 0.008      | 1,145                   | 97,402                   | 0.012      | 1.4126     | <b>9.14x10<sup>-29</sup></b>  |
|                               | >5%     | 35,826        | 5,538,199                | 0.006      | 10                      | 3,380                    | 0.003      | 0.4574     | 4.73x10 <sup>-1</sup>         |
| Non-coding transcript variant | MAC=2   | 8,193         | 530,667                  | 0.015      | 3,983                   | 249,612                  | 0.016      | 1.0335     | 1.00x10 <sup>0</sup>          |
|                               | ≤1%     | 11,076        | 718,234                  | 0.015      | 2,853                   | 174,105                  | 0.016      | 1.0626     | 1.18x10 <sup>-1</sup>         |
|                               | ≤5%     | 34,268        | 2,242,904                | 0.015      | 1,525                   | 97,402                   | 0.016      | 1.0248     | 1.00x10 <sup>0</sup>          |
|                               | >5%     | 81,785        | 5,538,199                | 0.015      | 52                      | 3,380                    | 0.015      | 1.0418     | 1.00x10 <sup>0</sup>          |
| Splice variant                | MAC=2   | 706           | 530,667                  | 0.001      | 371                     | 249,612                  | 0.001      | 1.1172     | 1.00x10 <sup>0</sup>          |
|                               | ≤1%     | 942           | 718,234                  | 0.001      | 235                     | 174,105                  | 0.001      | 1.0291     | 1.00x10 <sup>0</sup>          |
|                               | ≤5%     | 2,734         | 2,242,904                | 0.001      | 132                     | 97,402                   | 0.001      | 1.1118     | 1.00x10 <sup>0</sup>          |
|                               | >5%     | 6,266         | 5,538,199                | 0.001      | 1                       | 3,380                    | 0          | 0.2615     | 1.00x10 <sup>0</sup>          |
| Intergenic variant            | MAC=2   | 185,391       | 530,667                  | 0.349      | 83,769                  | 249,612                  | 0.336      | 0.9606     | <u>2.90x10<sup>-31</sup></u>  |
|                               | ≤1%     | 250,747       | 718,234                  | 0.349      | 57,876                  | 174,105                  | 0.332      | 0.9522     | <u>6.44x10<sup>-38</sup></u>  |
|                               | ≤5%     | 792,496       | 2,242,904                | 0.353      | 32,801                  | 97,402                   | 0.337      | 0.9531     | <u>9.94x10<sup>-25</sup></u>  |
|                               | >5%     | 2,024,326     | 5,538,199                | 0.366      | 1,289                   | 3,380                    | 0.381      | 1.0433     | 1.00x10 <sup>0</sup>          |
| Up/down stream                | MAC=2   | 43,485        | 530,667                  | 0.082      | 18,866                  | 249,612                  | 0.076      | 0.9224     | <u>1.37x10<sup>-20</sup></u>  |
|                               | ≤1%     | 58,941        | 718,234                  | 0.082      | 13,539                  | 174,105                  | 0.078      | 0.9476     | <u>1.25x10<sup>-7</sup></u>   |
|                               | ≤5%     | 187,100       | 2,242,904                | 0.083      | 7,341                   | 97,402                   | 0.075      | 0.9035     | <u>1.70x10<sup>-17</sup></u>  |
|                               | >5%     | 478,598       | 5,538,199                | 0.086      | 250                     | 3,380                    | 0.074      | 0.8559     | 3.49x10 <sup>-1</sup>         |
| Intron variant                | MAC=2   | 266,723       | 530,667                  | 0.503      | 127,154                 | 249,612                  | 0.509      | 1.0135     | <b>7.20x10<sup>-7</sup></b>   |
|                               | ≤1%     | 362,031       | 718,234                  | 0.504      | 88,560                  | 174,105                  | 0.509      | 1.0091     | <b>1.84x10<sup>-2</sup></b>   |
|                               | ≤5%     | 1,123,889     | 2,242,904                | 0.501      | 49,731                  | 97,402                   | 0.511      | 1.0189     | <b>2.19x10<sup>-7</sup></b>   |
|                               | >5%     | 2,710,890     | 5,538,199                | 0.489      | 1,632                   | 3,380                    | 0.483      | 0.9864     | 1.00x10 <sup>0</sup>          |

**Supplementary Table 4: Distribution of the consequences for the variants exclusive to the MANOLIS reference panel compared to those shared with UK10K and/or 1000 Genomes.**

Consequence: each variant was assigned a consequence according to Ensembl, then consequence terms were pooled into one of the eight categories (see methods for details); MAF, minor allele frequency; MAC, minor allele count; Shared, variants present in MANOLIS and also UK10K and/or 1000 Genomes; Variant count, number of variants in the given consequence category; Variant count in MAF bin, total number of variants in the MAF bin. Proportion: Variant count/ Variant count in MAF bin. Enrichment, proportion variants unique to MANOLIS/proportion of variants shared; P, P from the Bonferroni corrected two-sided proportions test; Bold indicates significant enrichment ( $P < 0.05$ ), underlined P indicates significant depletion ( $P < 0.05$ )

| Trait                | Cohorts           | Variant        | Genotype comparison |       |             |                |        |             | Directly typed genotype association |     |       |         |        |       |                          |      |
|----------------------|-------------------|----------------|---------------------|-------|-------------|----------------|--------|-------------|-------------------------------------|-----|-------|---------|--------|-------|--------------------------|------|
|                      |                   |                | MANOLIS             |       |             | Pomak          |        |             | EA                                  | NEA | EAF   | Effects | beta   | se    | P                        | N    |
|                      |                   |                | n                   | PPV   | Concordance | n              | PPV    | Concordance |                                     |     |       |         |        |       |                          |      |
| <b>Novel Signals</b> |                   |                |                     |       |             |                |        |             |                                     |     |       |         |        |       |                          |      |
| HDL                  | MANOLIS           | Chr16:70790626 | 1316                | 0.947 | 0.947       | 1442           | NA     | NA          | T                                   | C   | 0.007 | --      | -1.380 | 0.237 | 6.11 x 10 <sup>-9</sup>  | 1306 |
| TG                   | MANOLIS           | rs145556679    | 1315                | 1     | 0.871       | 1441           | NA     | 0           | C                                   | G   | 0.010 | --      | -1.266 | 0.199 | 2.22 x 10 <sup>-10</sup> | 1302 |
| VLDL                 | MANOLIS           | rs140087759    | 1314                | 0.960 | 0.828       | 1440           | 0.958  | 1           | C                                   | G   | 0.010 | --      | -1.272 | 0.200 | 1.83 x 10 <sup>-10</sup> | 1304 |
| WHR                  | MANOLIS           | rs13382259     | 1315                | 1     | 1           | 1440           | 1      | 1           | T                                   | C   | 0.009 | ++      | 1.198  | 0.228 | 1.51 x 10 <sup>-7</sup>  | 1110 |
| DBP                  | Pomak             | rs6131100      | 1304                | 1     | 1           | 1441           | 1      | 1           | T                                   | A   | 0.043 | ++      | 0.678  | 0.108 | 3.69 x 10 <sup>-10</sup> | 1017 |
| FGBMladj             | Pomak             | rs79748197     | 1313                | 0.667 | 0.952       | 1440           | 1      | 1           | A                                   | T   | 0.037 | --      | -0.910 | 0.149 | 1.08 x 10 <sup>-9</sup>  | 628  |
| WBC                  | Pomak             | rs557129696    | 1315                | 1     | 1           | 1440           | 1      | 1           | G                                   | A   | 0.007 | --      | -1.133 | 0.235 | 1.36 x 10 <sup>-6</sup>  | 1384 |
| HGB                  | Pomak             | rs17262443     | 1287                | 1     | 1           | 1441           | 1      | 1           | G                                   | T   | 0.004 | --      | -1.981 | 0.310 | 1.67 x 10 <sup>-10</sup> | 1374 |
| Weight*              | MANOLIS and Pomak | rs17262443     | 1287                | 1     | 1           | 1440           | 1      | 1           | C                                   | T   | 0.074 | ++++    | 0.273  | 0.056 | 1.20 x 10 <sup>-6</sup>  | 2465 |
| <b>Known Signals</b> |                   |                |                     |       |             |                |        |             |                                     |     |       |         |        |       |                          |      |
| LDL                  | MANOLIS and Pomak | rs7412         | Directly typed      |       |             | Directly typed |        |             |                                     |     |       |         |        |       |                          |      |
| TC                   | MANOLIS and Pomak | rs7553007      | Directly typed      |       |             | Directly typed |        |             |                                     |     |       |         |        |       |                          |      |
| VLDL                 | MANOLIS and Pomak | rs964184       | Directly typed      |       |             | Directly typed |        |             |                                     |     |       |         |        |       |                          |      |
| TG                   | MANOLIS and Pomak | rs964184       | Directly typed      |       |             | Directly typed |        |             |                                     |     |       |         |        |       |                          |      |
| TG                   | MANOLIS           | rs76353203     | Directly typed      |       |             | Directly typed |        |             |                                     |     |       |         |        |       |                          |      |
| HDL                  | MANOLIS           | rs76353203     | Directly typed      |       |             | Directly typed |        |             |                                     |     |       |         |        |       |                          |      |
| LDL                  | MANOLIS and Pomak | rs150641967    | 1318                | 0.839 | 1           | 1450           | 1      | 1           | T                                   | G   | 0.078 | ----    | -0.288 | 0.052 | 2.16 x 10 <sup>-8</sup>  | 2724 |
| TC                   | MANOLIS and Pomak | rs150641967    | 1318                | 0.839 | 1           | 1450           | 1      | 1           | T                                   | G   | 0.078 | ----    | -0.280 | 0.052 | 6.24 x 10 <sup>-8</sup>  | 2724 |
| TG                   | MANOLIS and Pomak | rs150641967    | 1318                | 0.839 | 1           | 1450           | 1      | 1           | T                                   | G   | 0.077 | ----    | -0.272 | 0.052 | 1.63 x 10 <sup>-7</sup>  | 2720 |
| VLDL                 | MANOLIS and Pomak | rs150641967    | 1318                | 0.839 | 1           | 1450           | 1      | 1           | T                                   | G   | 0.078 | ----    | -0.273 | 0.052 | 1.55 x 10 <sup>-7</sup>  | 2725 |
| HDL                  | MANOLIS and Pomak | rs35237252     | 1315                | 1     | 0.999       | 1429           | 0.9961 | 1           | A                                   | C   | 0.274 | ++++    | 0.177  | 0.031 | 1.00 x 10 <sup>-8</sup>  | 2731 |
| HDL                  | MANOLIS and Pomak | rs200751500    | 1284                | 0.823 | 0.993       | 1425           | 0.8930 | 0.997       | A                                   | C   | 0.386 | ++++    | 0.265  | 0.028 | 5.69 x 10 <sup>-21</sup> | 2730 |
| MCH                  | MANOLIS and Pomak | rs1331309      | 1306                | 0.998 | 1           | 1439           | 0.9985 | 1           | G                                   | T   | 0.223 | ++++    | 0.192  | 0.036 | 9.83 x 10 <sup>-8</sup>  | 2439 |
| WBC                  | MANOLIS and Pomak | rs1331309      | 1306                | 0.998 | 1           | 1439           | 0.9985 | 1           | T                                   | C   | 0.054 | ++      | 0.480  | 0.086 | 2.14 x 10 <sup>-8</sup>  | 1383 |
| MCH                  | MANOLIS and Pomak | rs1331309      | 1306                | 0.998 | 1           | 1439           | 0.9985 | 1           | T                                   | C   | 0.056 | --      | -0.595 | 0.084 | 1.62 x 10 <sup>-12</sup> | 1360 |
| MCHC                 | Pomak             | rs9804550      | 1316                | 0.946 | 1           | 1439           | 1      | 1           | T                                   | C   | 0.056 | ++      | 0.922  | 0.080 | 8.39 x 10 <sup>-31</sup> | 1380 |
| MCV                  | Pomak             | rs9804550      | 1316                | 0.946 | 1           | 1439           | 1      | 1           | T                                   | C   | 0.055 | --      | -1.029 | 0.081 | 3.84 x 10 <sup>-37</sup> | 1372 |
| RBC                  | Pomak             | rs9804550      | 1316                | 0.946 | 1           | 1439           | 1      | 1           | T                                   | C   | 0.056 | ++      | 0.461  | 0.082 | 1.78 x 10 <sup>-8</sup>  | 1422 |

**Supplementary Table 5: Validation results.** Directly-genotyped genotype concordance and association results for the novel and known signals.

Cohorts, cohorts in which the signal arose; n, the number of samples with non-missing imputed and directly-typed genotypes; PPV, minor allele positive predictive value; Concordance, minor allele concordance; EA, effect allele; NEA, non-effect allele; EAF, effect allele frequency; Effects, the direction of effect for each of the studies included in the analysis; P, Wald test P value from the association analysis using METACARPA; N, the number of samples in the analysis. NA, indicates that the samples were monomorphic; Directly typed, these variants were directly typed and the intensity clustering was good; TG, triglycerides; VLDL, very low density lipoprotein cholesterol; HDL, high-density lipoprotein cholesterol; DBP, diastolic blood pressure; WHR, waist-to-hip ratio; FGBMladjusted, fasting glucose adjusted for body mass index; WBC, white blood cells; HGB, haemoglobin; LDL, low-density lipoprotein cholesterol; TC, total cholesterol; CRP, C-reactive protein; MCH, mean corpuscular haemoglobin; MCHC, mean corpuscular haemoglobin concentration; MCV, mean corpuscular volume; RBC, red blood cells. \*Proxy validated for rs112037309 ( $r^2=1$ ).

| Trait                    | Genotypes <sup>a</sup> |                |                | Effect size <sup>b</sup> | P                        |
|--------------------------|------------------------|----------------|----------------|--------------------------|--------------------------|
| <b>chr16:70790626</b>    | <b>CC</b>              | <b>CT</b>      |                |                          |                          |
| Max N                    | 1454                   | 22             |                | -                        | -                        |
| Sex (M/F)                | 645/809                | 9/13           |                | 1.006 (0.79, 1.29)       | 9.61 x 10 <sup>-1</sup>  |
| Age (years) <sup>c</sup> | 61.466 (19.27)         | 49.773 (19.80) |                | -0.706 (0.26)            | 6.00 x 10 <sup>-3</sup>  |
| HDL (mmol/L)             | 1.267 (0.35)           | 0.779 (0.26)   |                | -1.713 (0.25)            | 1.57 x 10 <sup>-11</sup> |
| LDL (mmol/L)             | 3.251 (0.95)           | 3.220 (1.17)   |                | -0.088 (0.25)            | 7.31 x 10 <sup>-1</sup>  |
| TC (mmol/L)              | 5.250 (1.09)           | 4.938 (1.24)   |                | -0.364 (0.26)            | 1.54 x 10 <sup>-1</sup>  |
| TG (mmol/L)              | -0.042 (1.00)          | 0.543 (1.02)   |                | 0.577 (0.26)             | 2.62 x 10 <sup>-2</sup>  |
| VLDL (mmol/L)            | 0.727 (0.43)           | 0.938 (0.46)   |                | 0.568 (0.26)             | 2.89 x 10 <sup>-2</sup>  |
| <b>rs145556679</b>       | <b>GG</b>              | <b>GC</b>      |                |                          |                          |
| Max N                    | 1438                   | 38             |                | -                        | -                        |
| Sex (M/F)                | 638/800                | 16/22          |                | 1.001 (0.85, 1.18)       | 9.92 x 10 <sup>-1</sup>  |
| Age (years) <sup>c</sup> | 61.393 (19.23)         | 57.043 (22.54) |                | -0.100 (0.17)            | 5.65 x 10 <sup>-1</sup>  |
| HDL (mmol/L)             | 1.252 (0.35)           | 1.579 (0.40)   |                | 0.872 (0.17)             | 2.92 x 10 <sup>-7</sup>  |
| LDL (mmol/L)             | 3.248 (0.95)           | 3.312 (1.04)   |                | 0.013 (0.17)             | 9.42 x 10 <sup>-1</sup>  |
| TC (mmol/L)              | 5.244 (1.09)           | 5.307 (1.05)   |                | 0.021 (0.17)             | 9.04 x 10 <sup>-1</sup>  |
| TG (mmol/L)              | -0.016 (0.99)          | -1.255 (0.93)  |                | -1.134 (0.17)            | 2.53 x 10 <sup>-11</sup> |
| VLDL (mmol/L)            | 0.738 (0.43)           | 0.416 (0.20)   |                | -1.131 (0.17)            | 2.90 x 10 <sup>-11</sup> |
| <b>rs140087759</b>       | <b>CC</b>              | <b>CT</b>      |                |                          |                          |
| Max N                    | 1445                   | 30             |                | -                        | -                        |
| Sex (M/F)                | 636/809                | 18/12          |                | 1.136 (0.94, 1.37)       | 1.76 x 10 <sup>-1</sup>  |
| Age (years) <sup>c</sup> | 61.399 (19.27)         | 55.222 (21.47) |                | 0.162 (0.20)             | 4.12 x 10 <sup>-1</sup>  |
| WHR (cm/cm)              | 0.926 (0.10)           | 1.008 (0.10)   |                | -1.189 (0.21)            | 1.35 x 10 <sup>-8</sup>  |
| <b>rs13382259</b>        | <b>AA</b>              | <b>TA</b>      | <b>TT</b>      |                          |                          |
| Max N                    | 1572                   | 157            | 8              | -                        | -                        |
| Sex (M/F)                | 495/1077               | 29/128         | 1/7            | 0.890 (0.84, 0.97)       | 3.95 x 10 <sup>-3</sup>  |
| Age (years) <sup>c</sup> | 45.018 (15.52)         | 45.116 (15.40) | 37.625 (14.17) | 0.010 (0.08)             | 9.01 x 10 <sup>-1</sup>  |
| DBP (mm/Hg)              | 84.395 (12.56)         | 91.484 (15.71) | 85.000 (12.91) | -0.554 (0.10)            | 3.18 x 10 <sup>-8</sup>  |
| <b>rs6131100</b>         | <b>TT</b>              | <b>TA</b>      | <b>AA</b>      |                          |                          |
| Max N                    | 1603                   | 133            | 1              | -                        | -                        |
| Sex (M/F)                | 483/1120               | 42/91          | 0/1            | 1.00 (0.92, 1.07)        | 9.93 x 10 <sup>-1</sup>  |
| Age (years) <sup>c</sup> | 44.885 (15.43)         | 46.288 (16.33) | 42             | -0.046 (0.09)            | 6.13 x 10 <sup>-1</sup>  |
| FGBMIadj (mmol/L)        | 4.843 (0.76)           | 4.341 (0.81)   | -              | 0.790 (0.14)             | 1.21 x 10 <sup>-8</sup>  |
| <b>rs79748197</b>        | <b>AA</b>              | <b>AG</b>      | <b>GG</b>      |                          |                          |
| Max N                    | 1710                   | 26             | 1              | -                        | -                        |
| Sex (M/F)                | 519/1191               | 6/20           | 0/1            | 0.967 (0.81, 1.15)       | 7.02 x 10 <sup>-1</sup>  |
| Age (years)              | 44.951 (15.50)         | 47.656 (15.53) | -              | -0.252 (0.21)            | 2.27 x 10 <sup>-1</sup>  |
| WBC (10 <sup>9</sup> /L) | 7.147 (1.71)           | 5.412 (1.11)   | -              | 1.156 (0.21)             | 3.00 x 10 <sup>-8</sup>  |
| <b>rs557129696</b>       | <b>TT</b>              | <b>TG</b>      |                |                          |                          |
| Max N                    | 1723                   | 14             |                | -                        | -                        |
| Sex (M/F)                | 522/1201               | 3/11           |                | 1.159 (0.89, 1.51)       | 2.80 x 10 <sup>-1</sup>  |
| Age (years) <sup>c</sup> | 44.885 (15.51)         | 45.700 (14.77) |                | 0.043 (0.30)             | 8.84 x 10 <sup>-1</sup>  |
| HGB (g/dl)               | 13.875 (1.33)          | 11.169 (0.84)  |                | -2.027 (0.31)            | 4.83 x 10 <sup>-11</sup> |
| <b>rs112037309</b>       | <b>GG</b>              | <b>AG</b>      | <b>AA</b>      |                          |                          |
| Max N                    | 2744                   | 434            | 22             | -                        | -                        |
| Sex (M/F)                | 1005/1739              | 166/268        | 6/16           | 0.100 (0.95, 1.04)       | 9.28 x 10 <sup>-1</sup>  |
| Age (years) <sup>c</sup> | 52.528 (19.22)         | 51.326 (18.61) | 57.927 (20.69) | 0.025 (0.05)             | 6.12 x 10 <sup>-1</sup>  |
| Weight (kg)              | 74.441 (15.05)         | 79.635 (15.37) | 75.465 (12.3)  | -0.287 (0.05)            | 2.70 x 10 <sup>-8</sup>  |

**Supplementary Table 6: Genotype summary statistics for the novel signals, including age and sex association results.**

Max N, maximum sample number; HDL, high-density lipoprotein cholesterol; LDL, low-density lipoprotein cholesterol; TG, triglycerides; TC, total cholesterol; VLDL, very low density lipoprotein cholesterol; DBP, diastolic blood pressure; WHR, waist-to-hip ratio; FGBMIadj, fasting glucose adjusted for body mass index; WBC, white blood cells; HGB, haemoglobin; P, Wald test from the association analysis using METACARPA. <sup>a</sup>Untransformed mean (s.d.) except TG which is log transformed is presented as median (s.d.). <sup>b</sup>For continuous traits beta values (standard error) are reported, whereas for binary traits odds ratios and 95% confidence intervals are reported. <sup>c</sup>Inverse-normalised for analysis.

| Population (code)                       | Allele 1        | Allele 2        |
|-----------------------------------------|-----------------|-----------------|
| <b>Total 1000 Genomes dataset (ALL)</b> | <b>G:0.9998</b> | <b>C:0.0002</b> |
| <b>Total South Asian Ancestry (SAS)</b> | <b>G:1.0</b>    | <b>C:0.0</b>    |
| Bengali (BEB)                           | G:1.0           | C:0.0           |
| Gujarati Indian (GIH)                   | G:1.0           | C:0.0           |
| Indian Telugu (ITU)                     | G:1.0           | C:0.0           |
| Punjabi in Lahore (PJL)                 | G:1.0           | C:0.0           |
| Sri Lankan Tamil (STU)                  | G:1.0           | C:0.0           |
| Total East Asian Ancestry (EAS)         | G:1.0           | C:0.0           |
| Chinese Dai in Xishuangbanna (CDX)      | G:1.0           | C:0.0           |
| Han Chinese in Beijing (CHB)            | G:1.0           | C:0.0           |
| Southern Han Chinese (CHS)              | G:1.0           | C:0.0           |
| Japanese in Tokyo, Japan (JPT)          | G:1.0           | C:0.0           |
| Kinh in Ho Chi Minh City (KHV)          | G:1.0           | C:0.0           |
| Total Americas Ancestry (AMR)           | G:1.0           | C:0.0           |
| Colombian (CLM)                         | G:1.0           | C:0.0           |
| Mexican Ancestry (MXL)                  | G:1.0           | C:0.0           |
| Peruvian (PEL)                          | G:1.0           | C:0.0           |
| Puerto Rican (PUR)                      | G:1.0           | C:0.0           |
| <b>Total African Ancestry (AFR)</b>     | <b>G:1.0</b>    | <b>C:0.0</b>    |
| African Caribbean (ACB)                 | G:1.0           | C:0.0           |
| African American (ASW)                  | G:1.0           | C:0.0           |
| Esan (ESN)                              | G:1.0           | C:0.0           |
| Luhya (LWK)                             | G:1.0           | C:0.0           |
| Gambian (MAG)                           | G:1.0           | C:0.0           |
| Mende (MSL)                             | G:1.0           | C:0.0           |
| Yoruba (YRI)                            | G:1.0           | C:0.0           |
| <b>Total European Ancestry (EUR)</b>    | <b>G:0.999</b>  | <b>C:0.001</b>  |
| Western European ancestry (CEU)         | G:1.0           | C:0.0           |
| Finnish (FIN)                           | G:1.0           | C:0.0           |
| British (GBR)                           | G:1.0           | C:0.0           |
| Iberian (IBS)                           | G:1.0           | C:0.0           |
| Toscani (TSI)                           | G:0.9953        | C:0.0047        |

**Supplementary Table 7: Allele frequencies of rs145556679 in worldwide populations.**

Phase 3 frequencies from the 1000 Genomes project.

| Trait      | Variant                  | Cohorts                  | Chr:pos                             | Reported variant         | Reported variant chr:pos | Conditional P            | Reported GWAS trait association                                  | Reference PMID                                                                |
|------------|--------------------------|--------------------------|-------------------------------------|--------------------------|--------------------------|--------------------------|------------------------------------------------------------------|-------------------------------------------------------------------------------|
| HDL        | Chr16:70790626           | MANOLIS                  | 16:70790626                         | NA                       |                          |                          |                                                                  |                                                                               |
|            |                          |                          |                                     | rs2160669                | 11:116647607             | 3.40 x 10 <sup>-11</sup> | TG                                                               | 24097068                                                                      |
|            |                          |                          |                                     | rs964184                 | 11:116648917             | 1.04 x 10 <sup>-10</sup> | Lipid traits, coronary heart disease and hypertriglyceridemia    | 2068656, 24262325, 21378990, 24097068, 23505323, 20686565, 22003152, 22359512 |
|            |                          |                          |                                     | rs11823543               | 11:116649135             | 3.72 x 10 <sup>-11</sup> | TG-Blood Pressure                                                | 21386085                                                                      |
|            |                          |                          |                                     | rs12286037               | 11:116652207             | 3.72 x 10 <sup>-11</sup> | TG and lipoprotein-associated phospholipase A2 activity and mass | 20442857, 18193043                                                            |
|            |                          |                          |                                     | rs6589566                | 11:116652423             | 7.29 x 10 <sup>-11</sup> | LDL, TG                                                          | 18179892, 23726366                                                            |
|            |                          |                          |                                     | rs2075290                | 11:116653296             | 3.44 x 10 <sup>-11</sup> | HDL-TG                                                           | 21386085                                                                      |
|            |                          |                          |                                     | rs603446                 | 11:116654435             | 1.06 x 10 <sup>-10</sup> | TG                                                               | 21909109                                                                      |
|            |                          |                          |                                     | rs2266788                | 11:116660686             | 7.51 x 10 <sup>-11</sup> | TG-Blood Pressure and HDL-TG                                     | 21386085                                                                      |
|            |                          |                          |                                     | rs651821                 | 11:116662579             | 8.06 x 10 <sup>-11</sup> | Lipid traits & lipid metabolism phenotypes                       | 22286219, 24386095, 22171074                                                  |
|            |                          |                          |                                     | rs662799                 | 11:116663707             | 8.02 x 10 <sup>-11</sup> | Lipid traits                                                     | 24023260                                                                      |
|            |                          |                          |                                     | rs76353203               | 11:116701353             | 1.09 x 10 <sup>-12</sup> | HDL, TG                                                          | 24343240                                                                      |
|            |                          |                          |                                     | rs2075292                | 11:116732512             | 3.22 x 10 <sup>-11</sup> | TG                                                               | 18193046                                                                      |
|            |                          |                          |                                     | rs139961185 <sup>a</sup> | 11:116807343             | 1.72 x 10 <sup>-10</sup> | TG                                                               | 24886709                                                                      |
|            |                          |                          |                                     | rs11216230               | 11:116884789             | 2.55 x 10 <sup>-11</sup> | HDL                                                              | 24886709                                                                      |
| rs508487   | 11:117075566             | 4.73 x 10 <sup>-11</sup> | Cardiovascular disease risk factors | 21943158                 |                          |                          |                                                                  |                                                                               |
| rs10892151 | 11:117531731             | 2.29 x 10 <sup>-11</sup> | TG                                  | 19074352                 |                          |                          |                                                                  |                                                                               |
| rs11603023 | 11:118486067             | 3.52 x 10 <sup>-11</sup> | TC                                  | 24097068                 |                          |                          |                                                                  |                                                                               |
| VLDL       | rs145556679              | MANOLIS                  | 11:117643264                        | rs2160669                | 11:116647607             | 3.85 x 10 <sup>-11</sup> | TG                                                               | 24097068                                                                      |
|            |                          |                          |                                     | rs964184                 | 11:116648917             | 1.13 x 10 <sup>-10</sup> | Lipid traits, coronary heart disease and hypertriglyceridemia    | 2068656, 24262325, 21378990, 24097068, 23505323, 20686565, 22003152, 22359512 |
|            |                          |                          |                                     | rs11823543               | 11:116649135             | 4.21 x 10 <sup>-11</sup> | TG-Blood Pressure                                                | 21386085                                                                      |
|            |                          |                          |                                     | rs12286037               | 11:116652207             | 4.21 x 10 <sup>-11</sup> | TG and lipoprotein-associated phospholipase A2 activity and mass | 20442857, 18193043                                                            |
|            |                          |                          |                                     | rs6589566                | 11:116652423             | 8.05 x 10 <sup>-11</sup> | LDL, TG                                                          | 18179892, 23726366                                                            |
|            |                          |                          |                                     | rs2075290                | 11:116653296             | 3.89 x 10 <sup>-11</sup> | HDL-TG                                                           | 21386085                                                                      |
|            |                          |                          |                                     | rs603446                 | 11:116654435             | 9.71 x 10 <sup>-10</sup> | TG                                                               | 21909109                                                                      |
|            |                          |                          |                                     | rs2266788                | 11:116660686             | 9.31 x 10 <sup>-11</sup> | TG-Blood Pressure and HDL-TG                                     | 21386085                                                                      |
|            |                          |                          |                                     | rs651821                 | 11:116662579             | 8.95 x 10 <sup>-10</sup> | Lipid traits and lipid metabolism phenotypes                     | 22286219, 24386095, 22171074                                                  |
|            |                          |                          |                                     | rs662799                 | 11:116663707             | 8.91 x 10 <sup>-11</sup> | Lipid traits                                                     | 24023260                                                                      |
|            |                          |                          |                                     | rs76353203               | 11:116701353             | 1.22 x 10 <sup>-12</sup> | HDL, TG                                                          | 24343240                                                                      |
|            |                          |                          |                                     | rs2075292                | 11:116732512             | 3.63 x 10 <sup>-11</sup> | TG                                                               | 18193046                                                                      |
|            |                          |                          |                                     | rs139961185 <sup>a</sup> | 11:116807343             | 2.31 x 10 <sup>-10</sup> | TG                                                               | 24886709                                                                      |
|            |                          |                          |                                     | rs11216230               | 11:116884789             | 3.00 x 10 <sup>-11</sup> | HDL                                                              | 24886709                                                                      |
|            |                          |                          |                                     | rs508487                 | 11:117075566             | 5.77 x 10 <sup>-11</sup> | Cardiovascular disease risk factors                              | 21943158                                                                      |
| rs10892151 | 11:117531731             | 2.61 x 10 <sup>-11</sup> | TG                                  | 19074352                 |                          |                          |                                                                  |                                                                               |
| rs11603023 | 11:118486067             | 3.93 x 10 <sup>-11</sup> | TC                                  | 24097068                 |                          |                          |                                                                  |                                                                               |
| DBP        | rs816463                 | MANOLIS                  | 5:4872780                           | NA                       |                          |                          |                                                                  |                                                                               |
| WHR        | rs140087759              | MANOLIS                  | 5:28292892                          | NA                       |                          |                          |                                                                  |                                                                               |
| DBP        | rs13382259               | Pomak                    | 2:113934176                         | NA                       |                          |                          |                                                                  |                                                                               |
| FGBMIadj   | rs6131100                | Pomak                    | 20:10434530                         | NA                       |                          |                          |                                                                  |                                                                               |
| WBC        | rs79748197               | Pomak                    | 2:19430105                          | NA                       |                          |                          |                                                                  |                                                                               |
| HGB        | rs55712969c <sup>b</sup> | Pomak                    | 11:5328683                          | rs7116019                | 11:4618606               | 5.19 x 10 <sup>-11</sup> | MCV, MCHC, MCH                                                   | 25373335                                                                      |
|            |                          |                          |                                     | rs12788102               | 11:4790575               | 4.47 x 10 <sup>-11</sup> | Malaria                                                          | 23717212                                                                      |
|            |                          |                          |                                     | rs12274659               | 11:4947444               | 5.28 x 10 <sup>-11</sup> | MCV                                                              | 25373335                                                                      |
|            |                          |                          |                                     | rs11035019               | 11:5009563               | 5.28 x 10 <sup>-11</sup> | MCV                                                              | 25373335                                                                      |
|            |                          |                          |                                     | rs2445284                | 11:5029703               | 7.04 x 10 <sup>-11</sup> | Sickle cell anemia (haemolysis)                                  | 23406172                                                                      |
|            |                          |                          |                                     | rs7950726                | 11:5225447               | 3.59 x 10 <sup>-10</sup> | HbA <sub>1c</sub> levels                                         | 23043469                                                                      |
|            |                          |                          |                                     | rs11036238               | 11:5225635               | 6.73 x 10 <sup>-11</sup> | Malaria                                                          | 19465909                                                                      |
|            |                          |                          |                                     | rs2071348                | 11:5264146               | 6.37 x 10 <sup>-11</sup> | Beta thalassaemia/haemoglobin E disease                          | 20183929                                                                      |
|            |                          |                          |                                     | rs4910742                | 11:5306509               | 5.08 x 10 <sup>-11</sup> | Foetal haemoglobin levels and Inflammatory biomarkers            | 18245381                                                                      |
|            |                          |                          |                                     | rs5006884                | 11:5373251               | 4.82 x 10 <sup>-11</sup> | Foetal haemoglobin levels                                        | 20018918                                                                      |
|            |                          |                          |                                     | rs7948471                | 11:5471746               | 7.24 x 10 <sup>-11</sup> | Sickle cell anemia (haemolysis)                                  | 23406172                                                                      |
|            |                          |                          |                                     | rs37209 <sup>c</sup>     | 11:5518156               | 1.22 x 10 <sup>-8</sup>  | Malaria                                                          | 22895189                                                                      |
| Weight     | rs112037309              | MANOLIS and Pomak        | 4:106617136                         | NA                       |                          |                          |                                                                  |                                                                               |

**Supplementary Table 8: Conditional analysis.** Conditional analysis results for the novel variants using previously reported genome-wide significant ( $P \leq 5.00 \times 10^{-8}$ ) variants within 1Mb.

Cohorts, cohorts in which the signal arose; Chr:position represents the chromosome and position in GRCh37/hg19 coordinates; Reported variant, RS-id of the reported signal variant; Reported variant chr:pos, the chromosome and position in GRCh37/hg19 coordinates for the reported variant; Conditional P, this is the Wald test from METACARPA after conditioning on the reported variant; Reference PMID, reference for the known GWAS signal. The abbreviations are: TG, triglycerides; VLDL, very low density lipoprotein cholesterol; HDL, high-density lipoprotein cholesterol; DBP, diastolic blood pressure; WHR, waist-to-hip ratio; FGBMIadj, fasting glucose adjusted for body mass index; WBC, white blood cells; HGB, haemoglobin; LDL, low-density lipoprotein cholesterol; TC, total cholesterol; MCV, mean corpuscular volume; MCHC, mean corpuscular haemoglobin concentration; MCH, mean corpuscular haemoglobin; HbA<sub>1c</sub>, haemoglobin A<sub>1c</sub>. <sup>a</sup> rs139961185 was only present in MANOLIS OmniExome therefore the conditional P is the likelihood ratio test from the association analysis using GEMMA. <sup>b</sup> rs7120391 is a known GWAS hit for RBC trait and rs4910742 (chr11:5306509) is a known GWAS hit for foetal haemoglobin levels these variants were not present in the Pomak data and therefore conditional analysis could not be performed. <sup>c</sup> rs37209 was only present in Pomak OmniExome therefore the conditional P is the likelihood ratio test from the association analysis using GEMMA.

|                                                                   | <i>Inside LCR (Inaccessible)</i> |                      |                  | <i>Outside LCR (accessible)</i> |                      |                     |
|-------------------------------------------------------------------|----------------------------------|----------------------|------------------|---------------------------------|----------------------|---------------------|
|                                                                   | <b>Raw</b>                       | <b>VQSR-filtered</b> | <b>Phased</b>    | <b>Raw</b>                      | <b>VQSR-filtered</b> | <b>Phased</b>       |
| <b>Number of sites</b>                                            | 2049810                          | 491003               | 152287           | 34363557                        | 10315908             | 9411321             |
| <b>Total length</b>                                               | 297790473                        |                      |                  | 2842254171                      |                      |                     |
| <b>Fraction of genome</b>                                         | 9.48%                            |                      |                  | 90.5%                           |                      |                     |
| <b>SNP Density (SNP/Kbp)</b>                                      | 6.88                             | 1.65                 | 0.51             | 12.09                           | 3.63                 | 3.31                |
| <b>Number (Fraction) of rare (MAF&lt;1%) sites</b>                | 482955<br>(28.7%)                | 55909<br>(18.3%)     | 18984<br>(12.5%) | 25475182<br>(69.5%)             | 3012997<br>(29.5%)   | 1661168<br>(17.65%) |
| <b>Number (Fraction) of low-frequency (1%&lt;MAF&lt;5%) sites</b> | 573190<br>(34%)                  | 44917<br>(14.7%)     | 39884<br>(26.2%) | 4605358<br>(12.6%)              | 2324450<br>(22.7%)   | 2301572<br>(24.4%)  |
| <b>Number (Fraction) of common (5%&lt;MAF) sites</b>              | 622851<br>(37%)                  | 204498<br>(66.9%)    | 93419<br>(61.3%) | 6581113<br>(17.9%)              | 4884646<br>(47.8%)   | 5448581<br>(57.9%)  |

**Supplementary Table 9: Variant densities in low complexity regions.**

| Consequence group                | Consequence term                                                                                                                                                                                             |
|----------------------------------|--------------------------------------------------------------------------------------------------------------------------------------------------------------------------------------------------------------|
| 3'/5' UTR                        | 3 prime UTR variant,<br>5 prime UTR variant                                                                                                                                                                  |
| Coding sequence variant          | coding sequence variant,<br>incomplete terminal codon variant,<br>initiator codon variant,<br>missense variant,<br>start lost,<br>stop gained,<br>stop lost,<br>stop retained variant,<br>synonymous variant |
| Intergenic variant               | intergenic variant,                                                                                                                                                                                          |
| Regulatory variant               | regulatory region variant,<br>TF binding site variant                                                                                                                                                        |
| Intron variant                   | intron variant                                                                                                                                                                                               |
| Splice-region variant            | splice acceptor variant,<br>splice donor variant,<br>splice region variant                                                                                                                                   |
| Upstream/Downstream gene variant | downstream gene variant,<br>upstream gene variant                                                                                                                                                            |
| Non-coding transcript variant    | mature miRNA variant,<br>Non coding transcript variant,<br>non coding exon variant,<br>non coding transcript exon variant                                                                                    |

**Supplementary Table 10: MANOLIS sequence variant consequence grouping.**

| Trait            | Derived information               | Unit of measurement | Exclusions            | Filter      | Covariates used           |
|------------------|-----------------------------------|---------------------|-----------------------|-------------|---------------------------|
| BMI              | Weight/height <sup>2</sup>        | kg/m <sup>2</sup>   |                       | > 4SDs      | Age,age <sup>2</sup>      |
| CRP              |                                   | mg/L                | < 0.1mg/L or > 10mg/L | < or > 3SDs | Age,age <sup>2</sup>      |
| DBP <sup>§</sup> |                                   | mmHg                | Age >70 yrs           | < or > 5SDs | Age,age <sup>2</sup> ,BMI |
| FG               |                                   | mmol/L              | > 7mmol/L             |             | Age,age <sup>2</sup>      |
| FGBMIadj         |                                   | mmol/L              | > 7mmol/L             |             | Age,age <sup>2</sup> ,BMI |
| FI               |                                   | μIU/ml              |                       | < or > 5SDs | Age,age <sup>2</sup>      |
| FIBMIadj         |                                   | μIU/ml              |                       | < or > 5SDs | Age,age <sup>2</sup> ,BMI |
| Height           |                                   | cm                  |                       | > 4SDs      | Age,age <sup>2</sup>      |
| HGB              |                                   | g/dl                |                       | < or > 3SDs | Age,age <sup>2</sup>      |
| HDL              |                                   | mmol/L              |                       | < or > 5SDs |                           |
| Hip              |                                   | cm                  |                       | > 4SDs      | Age,age <sup>2</sup>      |
| HipBMIadj        |                                   | cm                  |                       | > 4SDs      | Age,age <sup>2</sup> ,BMI |
| HOMA_ir          | (FI (μIU/ml) × FG (mmol/L) )/22.5 |                     |                       | < or > 5SDs | Age,age <sup>2</sup>      |
| HOMA_irBMIadj    | (FI (μIU/ml) × FG (mmol/L) )/22.5 |                     |                       | < or > 5SDs | Age,age <sup>2</sup> ,BMI |
| LDL              |                                   | mmol/L              |                       | < or > 5SDs |                           |
| MCH              |                                   | pg                  |                       | < or > 3SDs | Age,age <sup>2</sup>      |
| MCHC             |                                   | g/dL                |                       | < or > 3SDs | Age,age <sup>2</sup>      |
| MCV              |                                   | fl                  |                       | < or > 3SDs | Age,age <sup>2</sup>      |
| PCV              |                                   | %                   |                       | < or > 3SDs | Age,age <sup>2</sup>      |
| PLT              |                                   | 10 <sup>9</sup> /L  |                       | < or > 3SDs | Age,age <sup>2</sup>      |
| RBC              |                                   | 10 <sup>12</sup> /L |                       | < or > 3SDs |                           |
| SBP <sup>§</sup> |                                   | mmHg                | Age > 70 yrs          | < or > 5SDs | Age,age <sup>2</sup> ,BMI |
| TC               |                                   | mmol/L              |                       | < or > 5SDs |                           |
| TG               |                                   | mmol/L              |                       | < or > 5SDs |                           |
| VLDL             | TC-HDL-LDL                        | mmol/L              |                       |             |                           |
| Waist            |                                   | cm                  |                       | > 4SDs      | Age,age <sup>2</sup>      |
| WaistBMIadj      |                                   | cm                  |                       | > 4SDs      | Age,age <sup>2</sup> ,BMI |
| WBC              |                                   | 10 <sup>9</sup> /L  |                       | < or > 3SDs | Age,age <sup>2</sup>      |
| Weight           |                                   | kg                  |                       | > 4SDs      | Age,age <sup>2</sup>      |
| WHR              | Waist/hip                         | cm/cm               |                       | > 4SDs      | Age,age <sup>2</sup>      |
| WHRBMIadj        | Waist/hip                         | cm/cm               |                       | > 4SDs      | Age,age <sup>2</sup> ,BMI |

### Supplementary Table 11: Phenotype preparation.

The phenotypes were prepared separately for the HELIC cohort arrays. If the trait is derived the information for this is contained in the column headed derived information. <sup>§</sup>Individuals known to be taking anti-hypertensive or blood pressure lowering medication had their measurement adjusted by adding 15mmHg to raw SBP and 10mmHg to raw DBP. The trait abbreviations are: BMI, body mass index; CRP, C-reactive protein; DBP, diastolic blood pressure; FG, fasting glucose; FGBMIadj, fasting glucose adjusted for BMI; FI, fasting insulin; FIBMIadj, fasting insulin adjusted for BMI; HGB, haemoglobin; HDL, high-density lipoprotein cholesterol; HipBMIadj, hip adjusted for BMI; HOMA\_ir, homeostasis model assessment of insulin resistance; HOMA\_irBMIadj, homeostasis model assessment of insulin resistance adjusted for BMI; LDL, low-density lipoprotein cholesterol; MCH, mean corpuscular haemoglobin; MCHC, mean corpuscular haemoglobin concentration; MCV, mean corpuscular volume; PCV, haematocrit; PLT, platelets; RBC, red blood cells; SBP, systolic blood pressure; TC, total cholesterol; TG, triglycerides; VLDL, very low density lipoprotein cholesterol; WBC, white blood cells; WaistBMIadj, waist adjusted for BMI; WHR, waist-to-hip ratio; WHRBMIadj, waist hip ratio adjusted for BMI. All traits were inverse normal transformed except for WBC and TG which were log transformed and MCHC was untransformed.



| Cohort           | HELIC MANOLIS OmniExome |                |                   |        | HELIC MANOLIS CoreExome |                |                   |        | HELIC Pomak OmniExome |                |                   |        | HELIC Pomak CoreExome |                |                   |        |
|------------------|-------------------------|----------------|-------------------|--------|-------------------------|----------------|-------------------|--------|-----------------------|----------------|-------------------|--------|-----------------------|----------------|-------------------|--------|
| N                | 1265                    |                |                   |        | 211                     |                |                   |        | 1003                  |                |                   |        | 734                   |                |                   |        |
| % females        | 57.31                   |                |                   |        | 45.97                   |                |                   |        | 72.48                 |                |                   |        | 66.08                 |                |                   |        |
| Mean age (range) | 62.06 (18 - 98)         |                |                   |        | 56.7 (18 - 91)          |                |                   |        | 43.3 (16 - 92)        |                |                   |        | 47.21 (18.2 - 89.8)   |                |                   |        |
| Trait            | N                       | Mean (sd)      | Range (min - max) | Lambda | N                       | Mean (sd)      | Range (min - max) | Lambda | N                     | Mean (sd)      | Range (min - max) | Lambda | N                     | Mean (sd)      | Range (min - max) | Lambda |
| BMI              | 1020                    | 29.47 (5.16)   | 16.98 - 50.11     | 1.003  | 204                     | 29.76 (4.9)    | 19.44 - 44        | 1.001  | 935                   | 27.8 (5.35)    | 16 - 47.47        | 0.992  | 725                   | 27.34 (5.59)   | 15.43 - 46.49     | 1.001  |
| CRP              | 1068                    | 2.35 (1.9)     | 0.3 - 8.7         | 1.023  | 188                     | 2.32 (1.76)    | 0.3 - 8.1         | 1.205  | 826                   | 1.81 (1.64)    | 0.3 - 7.7         | 0.989  | 607                   | 1.75 (1.54)    | 0.3 - 7           | 1.034  |
| DBP              | 574                     | 82.46 (12.13)  | 52 - 123          | 1.01   | 115                     | 81.43 (12.71)  | 51 - 128          | 1.027  | 551                   | 87.57 (13.29)  | 50 - 133          | 0.998  | 641                   | 82.72 (12.27)  | 60 - 120          | 1.008  |
| FG               | 701                     | 5.2 (0.78)     | 1.72 - 6.99       | 0.995  | 31                      | 4.29 (0.56)    | 3.22 - 5.66       | 1.113  | 177                   | 5.17 (0.75)    | 2.5 - 6.99        | 0.976  | 574                   | 4.69 (0.74)    | 2.05 - 6.99       | 1.022  |
| FGBMIadj         | 610                     | 5.24 (0.77)    | 1.72 - 6.99       | 1.001  | 31                      | 4.29 (0.56)    | 3.22 - 5.66       | 1.077  | 174                   | 5.18 (0.75)    | 2.5 - 6.99        | 0.971  | 569                   | 4.69 (0.75)    | 2.05 - 6.99       | 1.025  |
| FI               | 789                     | 12.11 (9.96)   | 2 - 71            | 1.026  | 35                      | 12.69 (7.23)   | 4 - 36            | 1.05   | 196                   | 12.03 (7.75)   | 2 - 49            | 1.001  | 618                   | 14.63 (13.49)  | 2 - 74            | 1.033  |
| FIBMIadj         | 690                     | 12.24 (10.33)  | 2 - 75            | 1.003  | 34                      | 12.41 (7.16)   | 4 - 36            | 0.986  | 193                   | 12.07 (7.81)   | 2 - 49            | 0.985  | 613                   | 14.69 (13.52)  | 2 - 74            | 1.038  |
| HDL              | 1255                    | 1.28 (0.36)    | 0.41 - 2.54       | 0.991  | 210                     | 1.15 (0.33)    | 0.41 - 2.15       | 1.143  | 992                   | 1.15 (0.31)    | 0.36 - 2.28       | 0.998  | 715                   | 1.22 (0.33)    | 0.47 - 2.51       | 1.008  |
| Height           | 1044                    | 162.45 (9.96)  | 135 - 192         | 0.983  | 204                     | 163.3 (10.26)  | 139 - 186         | 0.979  | 936                   | 162.31 (9.62)  | 120 - 196         | 1.028  | 732                   | 163.55 (10.01) | 138 - 199         | 1.006  |
| HGB              | 992                     | 14.1 (1.49)    | 9.9 - 18.2        | 0.992  | 205                     | 14.13 (1.56)   | 9.7 - 17.9        | 1.032  | 945                   | 13.8 (1.37)    | 9.7 - 17.9        | 1.01   | 717                   | 13.93 (1.31)   | 10 - 18.2         | 0.994  |
| Hip              | 1048                    | 107.86 (9.95)  | 73.3 - 148        | 1.008  | 204                     | 105.93 (9.34)  | 85 - 130.5        | 0.993  | 880                   | 105.81 (10.54) | 74 - 150          | 1      | 727                   | 106.07 (10.45) | 78 - 153          | 1.009  |
| HipBMIadj        | 996                     | 107.77 (9.86)  | 73.3 - 145        | 0.99   | 203                     | 105.88 (9.33)  | 85 - 130.5        | 0.962  | 868                   | 105.72 (10.49) | 74 - 150          | 0.985  | 724                   | 105.94 (10.2)  | 78 - 142          | 1.005  |
| HOMA_ir          | 792                     | 3.25 (3.26)    | 0.34 - 22.53      | 1.01   | 35                      | 3.04 (2.94)    | 0.71 - 13.59      | 1.079  | 194                   | 3.08 (2.65)    | 0.47 - 18.25      | 1.109  | 615                   | 3.33 (3.59)    | 0.35 - 22.79      | 1.028  |
| HOMA_irBMIadj    | 693                     | 3.33 (3.42)    | 0.34 - 23.43      | 1.003  | 34                      | 2.91 (2.89)    | 0.71 - 13.59      | 1.022  | 191                   | 3.1 (2.67)     | 0.47 - 18.25      | 0.996  | 610                   | 3.35 (3.6)     | 0.35 - 22.79      | 1.031  |
| LDL              | 1252                    | 3.27 (0.95)    | 0.54 - 8.08       | 1.001  | 210                     | 3.12 (0.96)    | 0.85 - 6.66       | 1.002  | 991                   | 3.15 (0.93)    | 0.67 - 7.1        | 0.984  | 715                   | 3.02 (0.93)    | 0.8 - 6.4         | 1.005  |
| MCH              | 981                     | 29.1 (2.38)    | 20.9 - 34.8       | 1.009  | 201                     | 29.52 (2.32)   | 21.1 - 35.1       | 0.976  | 935                   | 28.96 (1.9)    | 21.3 - 35.3       | 0.978  | 712                   | 29.41 (1.85)   | 22 - 35.5         | 1.006  |
| MCHC             | 994                     | 34.37 (0.85)   | 31.9 - 36.8       | 1.011  | 206                     | 33.88 (1.17)   | 30.9 - 36.5       | 1.053  | 947                   | 33.16 (1.1)    | 29.6 - 36.6       | 0.978  | 722                   | 33.47 (1.15)   | 29.6 - 37.2       | 0.98   |
| MCV              | 978                     | 84.64 (6.34)   | 61.5 - 98.5       | 1.002  | 202                     | 86.89 (5.98)   | 65.5 - 102.3      | 0.971  | 939                   | 87.1 (5.07)    | 68.4 - 101.8      | 0.971  | 719                   | 87.53 (4.81)   | 70.6 - 102.9      | 0.992  |
| PCV              | 994                     | 41.02 (4.23)   | 29.1 - 53.3       | 0.99   | 204                     | 41.77 (4.36)   | 30.2 - 54.3       | 1.054  | 947                   | 41.58 (3.6)    | 31.3 - 52.7       | 1.024  | 726                   | 41.45 (3.5)    | 31.3 - 51         | 1.007  |
| PLT              | 992                     | 211.31 (50.33) | 46 - 384          | 1.004  | 203                     | 205.64 (49.45) | 65 - 359          | 1.018  | 951                   | 242.06 (54.85) | 94 - 419          | 0.986  | 725                   | 238.54 (55.39) | 97 - 415          | 1.005  |
| RBC              | 1015                    | 4.89 (0.55)    | 3.27 - 6.83       | 1.017  | 208                     | 4.85 (0.58)    | 3.3 - 6.85        | 1.027  | 992                   | 4.78 (0.42)    | 3.62 - 6.39       | 1.002  | 726                   | 4.75 (0.41)    | 3.57 - 5.88       | 1.024  |
| SBP              | 575                     | 137.5 (22.15)  | 89 - 217          | 0.999  | 115                     | 136.75 (20.66) | 99 - 222          | 1.057  | 551                   | 138.77 (23.07) | 94 - 232          | 0.995  | 641                   | 129.93 (18.23) | 100 - 185         | 1.003  |
| TC               | 1254                    | 5.29 (1.09)    | 2.23 - 10.59      | 0.998  | 210                     | 5 (1.06)       | 2.69 - 8.47       | 1.003  | 991                   | 5.01 (1.05)    | 2.25 - 9.4        | 0.99   | 715                   | 5.01 (1.04)    | 2.33 - 8.86       | 1.004  |
| TG               | 1252                    | 1.59 (0.93)    | 0.35 - 8.05       | 0.995  | 209                     | 1.57 (0.87)    | 0.28 - 6.14       | 0.989  | 989                   | 1.53 (0.83)    | 0.33 - 6.2        | 1.011  | 714                   | 1.69 (0.9)     | 0.41 - 6.27       | 1.024  |
| VLDL             | 1253                    | 0.73 (0.43)    | 0.16 - 3.68       | 0.997  | 210                     | 0.73 (0.44)    | 0.13 - 3.34       | 0.995  | 992                   | 0.71 (0.4)     | 0.16 - 3.37       | 1.002  | 715                   | 0.78 (0.44)    | 0.18 - 3.26       | 1.009  |
| Waist            | 1057                    | 98.88 (13.44)  | 62 - 141          | 1.008  | 204                     | 104.75 (13)    | 68.5 - 142        | 1.003  | 889                   | 90.34 (14.55)  | 58 - 147          | 0.993  | 729                   | 95.09 (16.13)  | 58 - 152          | 1.009  |
| WaistBMIadj      | 1002                    | 98.6 (13.45)   | 62 - 137          | 0.985  | 203                     | 104.76 (13.04) | 68.5 - 142        | 0.988  | 877                   | 90.25 (14.47)  | 58 - 147          | 0.995  | 726                   | 95.06 (16.1)   | 58 - 152          | 0.996  |
| WBC              | 986                     | 6.96 (1.7)     | 2.6 - 12.5        | 1.01   | 203                     | 6.99 (1.78)    | 2.15 - 11.5       | 0.995  | 948                   | 6.98 (1.72)    | 2.6 - 12.2        | 1.018  | 725                   | 7.3 (1.69)     | 2.9 - 12.6        | 1.026  |
| Weight           | 1053                    | 77.63 (15.23)  | 38.7 - 143        | 1.003  | 205                     | 79.59 (15.75)  | 42 - 130          | 1.021  | 945                   | 73.17 (14.55)  | 36 - 126          | 1.009  | 727                   | 72.98 (15)     | 39 - 131          | 1      |
| WHR              | 1047                    | 0.92 (0.1)     | 0.63 - 1.19       | 1      | 204                     | 0.99 (0.09)    | 0.72 - 1.2        | 1.016  | 874                   | 0.85 (0.1)     | 0.65 - 1.13       | 1.008  | 727                   | 0.89 (0.1)     | 0.62 - 1.18       | 1.001  |
| WHRBMIadj        | 995                     | 0.91 (0.1)     | 0.63 - 1.18       | 0.995  | 203                     | 0.99 (0.09)    | 0.72 - 1.2        | 1.01   | 862                   | 0.85 (0.1)     | 0.65 - 1.13       | 1.004  | 725                   | 0.89 (0.1)     | 0.62 - 1.18       | 1.007  |

**Supplementary Table 12: Phenotype summary statistics.** The summary statistics for the raw data for each cohort set.

The abbreviations are: N, number of samples; BMI, body mass index; CRP, C-reactive protein; DBP, diastolic blood pressure; FG, fasting glucose; FGBMIadj, fasting glucose adjusted for BMI; FI, fasting insulin; FIBMIadj, fasting insulin adjusted for BMI; HGB, haemoglobin; HDL, high-density lipoprotein cholesterol; HipBMIadj, hip adjusted for BMI; HOMA\_ir, homeostasis model assessment of insulin resistance; HOMA\_irBMIadj, homeostasis model assessment of insulin resistance adjusted for BMI; LDL, low-density lipoprotein cholesterol; MCH, mean corpuscular haemoglobin; MCHC, mean corpuscular haemoglobin concentration; MCV, mean corpuscular volume; PCV, haematocrit; PLT, platelets; RBC, red blood cells; SBP, systolic blood pressure; TC, total cholesterol; TG, triglycerides; VLDL, very low density lipoprotein cholesterol; WBC, white blood cells; WaistBMIadj, waist adjusted for BMI; WHR, waist-to-hip ratio; WHRBMIadj, waist-to-hip ratio adjusted for BMI.

## Supplementary Note 1: Replicated known signals

For rs7412, which has been shown to be associated with lipid traits in Finnish populations<sup>1</sup>, we find an association with both low-density lipoprotein (LDL) levels (beta -0.42 (SE 0.047),  $P = 2.64 \times 10^{-19}$ , EAF = 0.079) and total cholesterol (TC) levels (beta -0.27 (SE 0.047),  $P = 1.05 \times 10^{-8}$ , EAF = 0.079) (Table 1). Rs7412 is a missense variant located in *APOE*.

We also replicate a previously reported<sup>2</sup> association across both populations with C-reactive protein (CRP) and rs7553007 (beta -0.20 (SE 0.03),  $P = 6.80 \times 10^{-12}$ , EAF = 0.327) (Table 1).

rs964184, another previously published<sup>3</sup> directly typed common variant, was associated in both populations with triglyceride levels (TG) (beta 0.24 (SE 0.03),  $P = 1.52 \times 10^{-11}$ , EAF = 0.163) (Table 1) and very low-density lipoprotein levels (VLDL) (beta 0.24 (SE 0.03),  $P = 3.68 \times 10^{-12}$ , EAF = 0.163) (Table 1).

Rs76353203 is directly typed and associated with HDL (beta 0.92 (SE 0.13),  $P = 1.78 \times 10^{-12}$ , EAF = 0.022) and TG (beta -1.07 (SE 0.13),  $P = 6.88 \times 10^{-17}$ , EAF = 0.022) (Table 1) in the MANOLIS cohort. These new data confirmed the association of rs76353203 with HDL and TG that were previously associated in 1267 samples genotyped on the exome chip in MANOLIS<sup>4</sup>.

We performed conditional analysis for those variants located within 1Mb of a known GWAS hit for the same trait and replicated 5 additional signals.

In both cohorts we observe associations with the indel rs150641967 and lipids: LDL (beta -0.33 (SE 0.05),  $P = 3.49 \times 10^{-11}$ , EAF = 0.075), TC (beta -0.32 (SE 0.05),  $P = 8.29 \times 10^{-11}$ , EAF = 0.074), TG (beta -0.28 (SE 0.05),  $P = 2.49 \times 10^{-8}$ , EAF=0.074) and VLDL (beta -0.28 (SE 0.05),  $P = 1.48 \times 10^{-8}$ , EAF = 0.075) (Table 1). rs150641967 resides in an intron of *HAPLN4* and conditional analysis revealed this was the same signal as rs10401969 located in an intron of *SUGP1* associated with LDL, TG and TC<sup>3</sup>.

We found an association between HDL in both populations and rs35237252 (beta 0.18 (SE 0.03),  $P = 4.04 \times 10^{-10}$ , EAF = 0.277) (Table 1), a regulatory region variant that overlaps with a promoter flanking region, which was found to be active in skeletal muscle and fibroblast cells<sup>5</sup>. rs35237252 was conditionally dependent on rs2083637, a previously identified intergenic variant<sup>6</sup> (Table 1).

A further association in both populations was identified for HDL at rs200751500 (beta 0.29 (SE 0.03),  $P = 4.02 \times 10^{-25}$ , EAF=0.330). The variant is situated in an intron of the cholesteryl ester transfer protein, plasma (*CETP*) gene, which also overlaps with a promoter flanking region found to be active in most tissues<sup>5</sup>. rs200751500 is conditionally dependent on another *CETP* intron variant rs1532624 previously reported for HDL in a large study comprising 17k samples from 16 different European regions<sup>6</sup>.

We observed an association between mean corpuscular haemoglobin (MCH) in both populations (beta 0.20 (SE 0.03),  $P = 1.90 \times 10^{-9}$  EAF = 0.228) (Table 1) and rs1331309. This signal could not be distinguished from numerous known blood cell related trait associations in this region, for example rs7775698, which is associated with MCH in Europeans<sup>7</sup>.

Finally, rs9804550 was found to be associated with white blood cells (WBC) in the Pomak population (beta 0.52 (SE 0.08),  $P = 1.10 \times 10^{-10}$ , EAF = 0.051) (Table 1). This was attenuated when taking into account a signal that we have previously reported for rs7116019 for blood traits in the same cohort<sup>8</sup>. This signal is also seen in other blood traits in the Pomak population: mean corpuscular haemoglobin (MCH) (beta -0.63 (SE 0.08),  $P = 2.19 \times 10^{-15}$ , EAF = 0.053) (Table 1); mean corpuscular haemoglobin concentration (MCHC), (beta 0.89 (SE 0.075),  $P = 8.46 \times 10^{-33}$ , EAF = 0.054) (Table 1); mean corpuscular volume (MCV) (beta -1.07 (SE 0.08),  $P = 1.57 \times 10^{-45}$ , EAF = 0.052) (Table 1); red blood cells (RBC) (beta 0.47 (SE 0.08),  $P = 8.58 \times 10^{-10}$  EAF = 0.054) (Table 1).

### **Supplementary Note 2: Low-complexity regions**

In the low complexity regions reported by Li, H *et al*<sup>9</sup>, which cover about 10% of the GRCh37 build, SNP density is much lower compared to the rest of the genome, at 6.8 SNPs/Kbp vs. 12.09 SNPs/Kbp (Supplementary Table 9). Filtering further reduces this ratio; in the phased dataset there are 6.5 times more SNPs per kilobase in the mappable genome than there are in the LCR. Although the allelic makeup of the variants in these regions is different from the average, we do not observe an excess of rare variants in the LCRs.

### **Supplementary Note 3: Genotype concordance between HELIC MANOLIS WGS and imputed data.**

There are 243 MANOLIS samples that overlap between the sequenced samples, included in the reference panel, and the imputed samples. We compared the imputed genotypes to the sequenced ones and find that the minor allele concordance is on average 94.2% for rare variants (<1%), 97.4% for low-frequency variants (1%<MAF<5%), and 99.7% for common variants (MAF>5%).

## **Supplementary Methods**

### **Fine-mapping**

We applied a method that assigns a relative probability of regulatory function (PRF) score among candidate causal variants, reweighting association statistics based on epigenomic annotations. Briefly, we collected a set of 70 genomic and epigenomic annotations, primarily GENCODE gene annotations (v19), FANTOM transcription start sites and enhancers<sup>10,11</sup>, and imputed Roadmap Epigenomics histone marks, DNase hypersensitivity, and ChromHMM genome segmentations for the lymphoblastoid cell line epigenome (GM12878)<sup>12,13</sup>. We used the fgwas software<sup>14</sup> to train a Bayesian hierarchical model to compute enrichment of eQTLs in these annotations based on summary statistics from the Geuvadis RNA- sequencing

project<sup>15</sup>. We used forward stepwise selection followed by cross-validation to arrive at a combined model with 37 annotations and their associated enrichments. The respective annotations from 119 Roadmap epigenomes were used to compute PRF scores in each of the 119 epigenomes. At each locus we selected the top four epigenomes based on the maximum regulatory score among variants in the 95% credible set, and examined the regulatory annotations for variants in the credible set. We attempted to fine-map all novel signals using a window of 1Mb either side of the index variant.

### **Array genotyping and quality control (QC)**

#### *HumanExome*

PLINK<sup>16</sup> was used to carry out the QC steps and variants were mapped to NCBI build 37 (hg19) coordinates and strand was standardised (<http://www.well.ox.ac.uk/~wrayner/strand/>). Post-Gencall all samples and variants with a call rate < 90% were excluded. Samples that displayed a call rate lower than 98%, sex discrepancies, or that violated identity to the OmniExpress genotypes were excluded, as well as heterozygosity outliers visualised using 2 different MAF bins (< 1% MAF and  $\geq$  1% MAF). Duplicates were excluded on the basis of identity by descent (IBD) calculated on low-frequency and common (MAF > 1%), LD pruned ( $r^2 < 0.2$ ) variants not located in complex regions. In any given pair that displayed  $\hat{\pi} > 0.9$ , we rejected the duplicate with the lowest call rate. Ethnic outliers were identified and excluded by merging with 1000 Genomes Project data<sup>17</sup> and carrying out IBD (as described above) followed by multi-dimensional scaling (MDS). zCall calling was performed using only those samples passing QC. Post zCall variants were excluded with GenCall call rate < 95%, a GenCall cluster separation score < 0.4, a zCall call rate < 99% and HWE  $P < 1 \times 10^{-4}$ . A total of 1267 MANOLIS samples with 239,606 variants and 1012 Pomak samples with 239,596 variants passed QC. The genotypes from the OmniExpress and HumanExome chips were merged into a single dataset.

#### *HumanCoreExome*

QC was performed as described above, except for the following changes. Identity checks were performed by comparing to Sequenom MassARRAY<sup>®</sup> genotypes, obtained at sample reception, to the array genotypes. For the duplicate identification and ethnicity QC, additional IBD and MDS analyses were carried out, in which the CoreExome samples were combined with the OmniExome samples.

### **Validation assay**

Assays for all SNPs were designed using the eXTEND suite and MassARRAY Assay Design software version 4.0.0.2 (Agena Bioscience, Inc.). Amplification was performed in a total volume of 5 $\mu$ L containing ~10ng genomic DNA, 100nM of each PCR primer, 500 $\mu$ M of each dNTP, 1.25 x PCR buffer (Qiagen), 1.625mM MgCl<sub>2</sub> and 1U HotStar Taq<sup>®</sup> (Qiagen). Reactions were heated to 94 °C for 15 min followed by 45 cycles at 94 °C for 20 s, 56 °C for 30 s and 72 °C for 1 min, then a final extension at 72 °C for 3 min. Unincorporated dNTPs were SAP digested prior to iPLEX<sup>™</sup> allele specific extension with mass-modified ddNTPs using an iPLEX reagent kit (Agena Bioscience, Inc.). SAP digestion and extension were performed according to the manufacturer's instructions with reaction extension primer concentrations adjusted to 0.7-1.8 $\mu$ M,

dependent upon primer mass. Extension products were desalted and dispensed onto a SpectroCHIP using a MassARRAY Nanodispenser prior to MALDI-TOF analysis with a MassARRAY Analyzer Compact mass spectrometer. Genotypes were automatically assigned and manually confirmed using MassARRAY TyperAnalyzer software version 4.0 (Agena Bioscience, Inc.). QC was carried out separately for each iPLEX. Samples with call rate < 80% were excluded. Variants with call rate < 90% or HWE  $P < 1 \times 10^{-4}$  were excluded. To test the concordance of imputed and directly typed genotypes, genotype dosages were converted to genotype calls, those with an uncertainty greater than 0.4 were set to missing and the rest were treated as hard calls. If the prioritised variant was already directly typed we visualised the array intensities using Scattershot (<http://www.well.ox.ac.uk/~wrayner/tools/>).

## References

- 1 Kettunen, J. *et al.* Genome-wide association study identifies multiple loci influencing human serum metabolite levels. *Nature genetics* **44**, 269-276, doi:10.1038/ng.1073 (2012).
- 2 Elliott, P. *et al.* Genetic Loci associated with C-reactive protein levels and risk of coronary heart disease. *Jama* **302**, 37-48, doi:10.1001/jama.2009.954 (2009).
- 3 Willer, C. J. *et al.* Discovery and refinement of loci associated with lipid levels. *Nature genetics* **45**, 1274-1283, doi:10.1038/ng.2797 (2013).
- 4 Tachmazidou, I. *et al.* A rare functional cardioprotective APOC3 variant has risen in frequency in distinct population isolates. *Nature communications* **4**, 2872, doi:10.1038/ncomms3872 (2013).
- 5 Flicek, P. *et al.* Ensembl 2014. *Nucleic acids research* **42**, D749-755, doi:10.1093/nar/gkt1196 (2014).
- 6 Aulchenko, Y. S. *et al.* Loci influencing lipid levels and coronary heart disease risk in 16 European population cohorts. *Nature genetics* **41**, 47-55, doi:10.1038/ng.269 (2009).
- 7 Ferreira, M. A. *et al.* Sequence variants in three loci influence monocyte counts and erythrocyte volume. *American journal of human genetics* **85**, 745-749, doi:10.1016/j.ajhg.2009.10.005 (2009).
- 8 Panoutsopoulou, K. *et al.* Genetic characterization of Greek population isolates reveals strong genetic drift at missense and trait-associated variants. *Nature communications* **5**, 5345, doi:10.1038/ncomms6345 (2014).
- 9 Li, H. Toward better understanding of artifacts in variant calling from high-coverage samples. *Bioinformatics* **30**, 2843-2851, doi:10.1093/bioinformatics/btu356 (2014).
- 10 Forrest, A. R. *et al.* A promoter-level mammalian expression atlas. *Nature* **507**, 462-470, doi:10.1038/nature13182 (2014).
- 11 Andersson, R. *et al.* An atlas of active enhancers across human cell types and tissues. *Nature* **507**, 455-461, doi:10.1038/nature12787 (2014).
- 12 Ernst, J. & Kellis, M. Large-scale imputation of epigenomic datasets for systematic annotation of diverse human tissues. *Nature biotechnology* **33**, 364-376, doi:10.1038/nbt.3157 (2015).
- 13 Kundaje, A. *et al.* Integrative analysis of 111 reference human epigenomes. *Nature* **518**, 317-330, doi:10.1038/nature14248 (2015).
- 14 Pickrell, J. K. Joint analysis of functional genomic data and genome-wide association studies of 18 human traits. *American journal of human genetics* **94**, 559-573, doi:10.1016/j.ajhg.2014.03.004 (2014).
